# Supplementary material
Source: PubMed Central journal article supplement (PMC6583071)

## Supplementary Online Content

Sieber FE, Neufeld KJ, Gottschalk A, et al. Effect of depth of sedation in older patients undergoing hip fracture repair on postoperative delirium: the STRIDE randomized clinical trial. *JAMA Surg*. Published online August 8, 2018. doi:10.1001/jamasurg.2018.2602

**eTable 1.** Raw numbers of patients diagnosed with delirium for main groups and subgroup analysis

**eTable 2.** Univariate analysis on associations between base line characteristics and incident post operative delirium in hospital

**eTable 3.** Intervention Effect Modification by CCI on Post Operative Incident Delirium Risk; CCI Truncated Values >2

**eTable 4.** Intervention Effect Modification by CCI on Post Operative Incident Delirium Risk; CCI Continuous Values

**eFigure.** Mini-Mental State Exam score and Delirium Rating Scale-Revised '98 severity score at baseline and postoperative days 1–5 in the lighter-sedation and heavier-sedation groups

This supplementary material has been provided by the authors to give readers additional information about their work.

**eTable 1.**

Raw numbers of patients diagnosed with delirium for main groups and sub-group analysis

| CCI            | Incident Delirium Cases / N |                  |        |
|----------------|-----------------------------|------------------|--------|
|                | Lighter Sedation            | Heavier Sedation | Total  |
| 0              | 10/39                       | 13/33            | 23/72  |
| 1              | 7/22                        | 10/26            | 17/48  |
| 2              | 6/18                        | 8/20             | 14/38  |
| 3              | 4/11                        | 3/8              | 7/19   |
| 4              | 3/5                         | 2/5              | 5/10   |
| 5              | 1/2                         | 2/4              | 3/6    |
| 6              | 0/0                         | 0/2              | 0/2    |
| 7              | 0/0                         | 0/0              | 0/0    |
| 8              | 3/3                         | 1/2              | 4/5    |
| <b>Overall</b> | 34/100                      | 39/100           | 73/200 |

**eTable 2:**  
**Univariate analysis on associations between base line characteristics and incident post operative delirium in hospital**

|                                                     | Total<br>(N = 200) | Delirium      |               | p-value |
|-----------------------------------------------------|--------------------|---------------|---------------|---------|
|                                                     |                    | Yes<br>(N=73) | No<br>(N=127) |         |
|                                                     |                    | Mean (SD)     |               |         |
| Age                                                 | 81.8 (7.7)         | 83.7 (7.2)    | 80.6 (7.8)    | 0.005   |
| Charlson Comorbidity Score                          | 1.5 (1.8)          | 2.1 (2.2)     | 1.5 (1.7)     | 0.06    |
|                                                     |                    | N (%)         |               |         |
| Charlson Comorbidity items:                         |                    |               |               |         |
| Myocardial Infarction                               | 23 (11.5)          | 12 (16.4)     | 11 ( 8.7)     | 0.11    |
| Congestive Heart Failure                            | 23 (11.5)          | 10 (13.7)     | 13 (10.2)     | 0.49    |
| Peripheral Vascular Disease                         | 12 ( 6.0)          | 4 ( 5.5)      | 8 ( 6.3)      | 1.00    |
| Chronic Obstructive<br>Pulmonary Disease            | 32 (16.0)          | 15 (20.6)     | 17 (13.4)     | 0.23    |
| Cerebrovascular Disease                             | 32 (16.0)          | 13 (17.8)     | 19 (15.0)     | 0.69    |
| Cancer                                              |                    |               |               |         |
| Any Solid Tumor                                     | 18 ( 9.0)          | 6 ( 8.2)      | 12 ( 9.5)     | 1.00    |
| Leukemia                                            | 2 ( 1.0)           | 2 ( 2.7)      | 0 ( 0.0)      | 0.13    |
| Lymphoma                                            | 4 ( 2.0)           | 2 ( 2.7)      | 2 ( 1.6)      | 0.62    |
| Metastatic Solid Tumor                              | 3 ( 1.5)           | 2 ( 2.7)      | 1 ( 0.8)      | 0.56    |
| Diabetes                                            |                    |               |               |         |
| Overall                                             | 33 (16.5)          | 14 (19.2)     | 19 (15.0)     | 0.44    |
| with End Organ Damage                               | 9 ( 4.5)           | 4 ( 5.5)      | 5 ( 3.9)      | 0.73    |
| Chronic Liver Disease                               |                    |               |               |         |
| Mild                                                | 2 ( 1.0)           | 0 ( 0.0)      | 2 ( 1.6)      | 0.53    |
| Moderate or Severe                                  | 1 ( 0.5)           | 0 ( 0.0)      | 1 ( 0.8)      | 1.00    |
| Chronic Kidney Disease                              | 4 ( 2.0)           | 1 ( 1.4)      | 3 ( 2.4)      | 1.00    |
| Dementia (N=199/72/127)                             | 22 (11.1)          | 13 (18.1)     | 9 ( 7.1)      | 0.032   |
| <b>Type of Fracture</b>                             |                    |               |               | 0.005   |
| Femoral Neck                                        | 89 (44.5)          | 22 (30.1)     | 67 (52.8)     |         |
| Intertrochanteric                                   | 95 (47.5)          | 42 (57.5)     | 53 (41.7)     |         |
| Subtrochanteric                                     | 16 ( 8.0)          | 9 (12.3)      | 7 ( 5.5)      |         |
| Mini Mental Status Exam                             | 24.3 (3.7)         | 23.0 (3.9)    | 25.0 (3.3)    | 0.0002  |
| Geriatric Depression Score Overall<br>N= 199/73/126 | 3.8 (3.5)          | 5.0 (3.8)     | 3.1 (3.1)     | 0.0005  |

**eTable 3:**  
**Intervention Effect Modification by CCI on Post Operative Incident Delirium Risk**  
**CCI Truncated Values >2**

| Analysis of Maximum Likelihood Estimates   |                    |                |            |               |                     |                                    |       |
|--------------------------------------------|--------------------|----------------|------------|---------------|---------------------|------------------------------------|-------|
| Parameter                                  | Parameter Estimate | Standard Error | Chi-Square | Pr > ChiSq    | Hazard Ratio        | 95% Hazard Ratio Confidence Limits |       |
| Age                                        | 0.02660            | 0.01682        | 2.4998     | 0.1139        | 1.027               | 0.994                              | 1.061 |
| MMSE score                                 | -0.07282           | 0.03200        | 5.1789     | 0.0229        | 0.930               | 0.873                              | 0.990 |
| Fracture Type, Femoral Neck                | -0.53302           | 0.26070        | 4.1801     | 0.0409        | 0.587               | 0.352                              | 0.978 |
| Geriatric Depression Scale score           | 0.07491            | 0.03015        | 6.1718     | 0.0130        | 1.078               | 1.016                              | 1.143 |
| Heavier Sedation                           | 0.83129            | 0.38840        | 4.5809     | 0.0323        | See eTable 3a below |                                    |       |
| Charlson Comorbidity Score (CCI3), 0 to 3* | 0.29340            | 0.15916        | 3.3983     | 0.0653        |                     |                                    |       |
| CCI3 x Heavier Sedation                    | -0.45090           | 0.21609        | 4.3540     | <b>0.0369</b> |                     |                                    |       |

\* CCI scores > 2 were coded as 3

**eTable 3a.**

| Hazard Ratios for Heavier vs Lighter Sedation |              |                       |       |
|-----------------------------------------------|--------------|-----------------------|-------|
|                                               | Hazard Ratio | 95% Confidence Limits |       |
| At CCI3 = 0                                   | 2.296        | 1.073                 | 4.916 |
| At CCI3 = 1                                   | 1.463        | 0.888                 | 2.411 |
| At CCI3 = 2                                   | 0.932        | 0.550                 | 1.580 |
| At CCI3 = 3                                   | 0.594        | 0.262                 | 1.343 |

**eTable 4:  
Intervention Effect Modification by CCI on Post Operative Incident Delirium Risk  
CCI Continuous Values**

| Analysis of Maximum Likelihood Estimates |                    |                |            |            |                     |                                    |       |
|------------------------------------------|--------------------|----------------|------------|------------|---------------------|------------------------------------|-------|
| Parameter                                | Parameter Estimate | Standard Error | Chi-Square | Pr > ChiSq | Hazard Ratio        | 95% Hazard Ratio Confidence Limits |       |
| Age                                      | 0.03339            | 0.01759        | 3.6050     | 0.0576     | 1.034               | 0.999                              | 1.070 |
| MMSE score                               | -0.06153           | 0.03210        | 3.6754     | 0.0552     | 0.940               | 0.883                              | 1.001 |
| Fracture Type, Femoral Neck              | -0.61849           | 0.26179        | 5.5817     | 0.0181     | 0.539               | 0.323                              | 0.900 |
| Geriatric Depression Scale score         | 0.06433            | 0.03077        | 4.3696     | 0.0366     | 1.066               | 1.004                              | 1.133 |
| Heavier Sedation                         | 0.78879            | 0.33846        | 5.4315     | 0.0198     | See eTable 4a below |                                    |       |
| Charlson Comorbidity Score (CCI)         | 0.24163            | 0.09076        | 7.0875     | 0.0078     |                     |                                    |       |
| CCI x Heavier Sedation                   | -0.33213           | 0.13292        | 6.2437     | 0.0125     |                     |                                    |       |

**eTable 4a.**

| Hazard Ratios for Heavier vs Lighter Sedation |              |                       |       |
|-----------------------------------------------|--------------|-----------------------|-------|
|                                               | Hazard Ratio | 95% Confidence Limits |       |
| At CCI3 = 0                                   | 2.201        | 1.134                 | 4.272 |
| At CCI3 = 1                                   | 1.579        | 0.945                 | 2.637 |
| At CCI3 = 2                                   | 1.133        | 0.707                 | 1.814 |
| At CCI3 = 3                                   | 0.813        | 0.463                 | 1.426 |
| At CCI3 = 4                                   | 0.583        | 0.278                 | 1.221 |
| At CCI3 = 5                                   | 0.418        | 0.161                 | 1.087 |
| At CCI3 = 6                                   | 0.300        | 0.091                 | 0.986 |
| At CCI3 = 7                                   | -            | -                     | -     |
| At CCI3 = 8                                   | 0.154        | 0.029                 | 0.829 |

Note: Surgery date was not a significant confounder and adjustment for it did not make any difference in the model results. There was no difference in risks of incident delirium in hospital across the 4 anesthesiologists, stratified by intervention arms or with both arms combined. Further accounting for anesthesiologists in the Cox models did not change the main results on intervention effect or subgroup analyses on modification of intervention effect by CCI scores.

**eFigure. Mini-Mental State Exam score and Delirium Rating Scale-Revised '98 severity score at baseline and postoperative days 1–5 in the lighter-sedation and heavier-sedation groups.**

Upper Panel: Mini-Mental State Exam score with 95% confidence bands at baseline and postoperative days 1–5. Lower Panel: Delirium Rating Scale-Revised '98 severity score with 95% confidence bands at baseline and postoperative days 1–5. The difference in MMSE scores at postoperative day1 between group was not statistically significant (Wilcoxon  $z=1.82$ ,  $p=0.07$ ); the adjusted mean MMSE change from baseline to postoperative day 1 between groups was  $-0.96$  (mixed effects model,  $t=-2.01$ ,  $p=0.04$ ). The difference in DRS severity scores at postoperative day1 between groups was statistically significant (Wilcoxon  $z=-2.61$ ,  $p=0.009$ ); the adjusted mean DRS severity score change from baseline to postoperative day1 between groups  $1.27$  (mixed effects model,  $t=2.07$ ,  $p=0.04$ ).

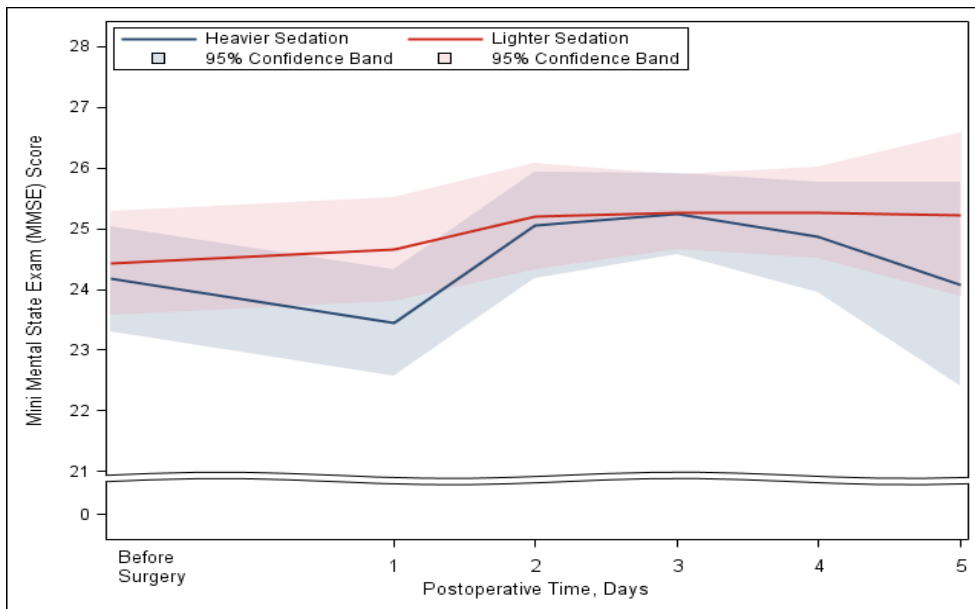

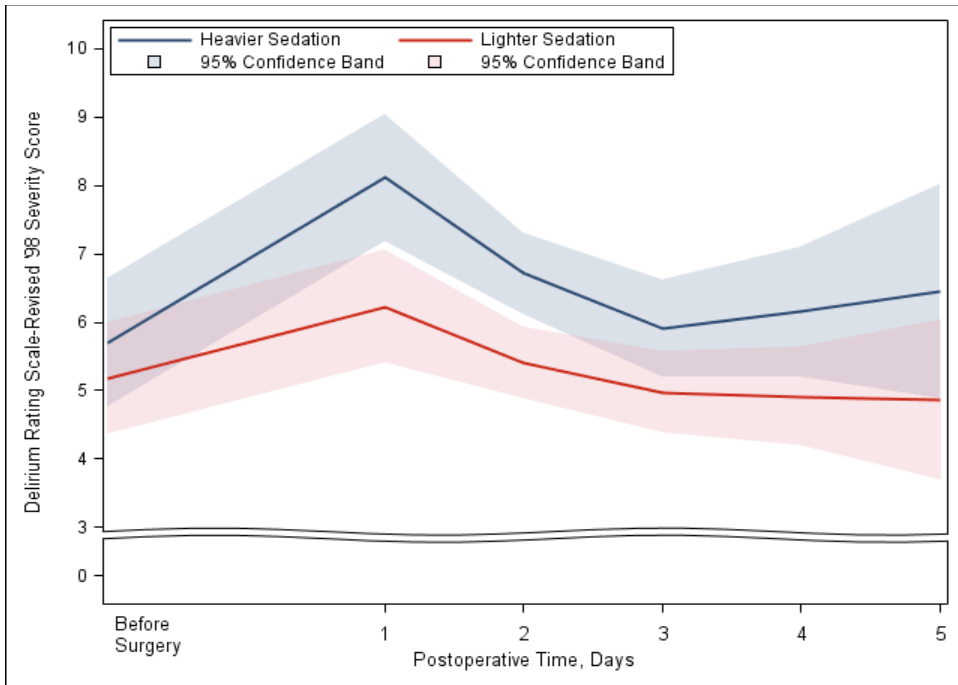

Supplement: jamasurg-153-987-s002.pdf [file jamasurg-153-987-s002.pdf]
