# Supplementary material
Source: PubMed Central journal article supplement (PMC6583071)
Supplement: jamasurg-153-987-s001.pdf [file jamasurg-153-987-s001.pdf]

## Appendix. STRIDE Protocol

### 1. Title

A Strategy to Reduce the Incidence of Post-Operative Delirium in Elderly patients (The STRIDE Study)

### 2. Trial registration

STRIDE is registered at ClinicalTrials.gov under registration number: NCT00590707.

### 3. Protocol version

Version 12, last revised on November 19, 2012

### 4. Funding:

The National Institute of Aging (NIA), National Institutes of Health, United States funds STRIDE under Grant R01 AG033615, Principal Investigator (PI): Frederick E. Sieber. The PI does not have any financial or competing interests to report.

### 5. Roles and responsibilities

#### 5a. Names, affiliations, and roles of protocol contributors:

| Role                                                                                  | Name                       | Contact                           |
|---------------------------------------------------------------------------------------|----------------------------|-----------------------------------|
| <b>Intervention</b>                                                                   |                            |                                   |
| Principal Investigator                                                                | Frederick E. Sieber, MD    | 410-550-0942<br>fsieber1@jhmi.edu |
| Study Anesthesiologist                                                                | Jean-Paul Ouanes, DO       | 410-550-4987<br>ouanes@jhmi.edu   |
| Study Anesthesiologist                                                                | Mahmood Jaber, MD          | 410-550-1389<br>mjaber3@jhmi.edu  |
| Study Surgeon                                                                         | Erik Hasenboehler, MD      | 410-955-1796<br>ehasenb1@jhmi.edu |
| <b>Trial oversight, coordination, and data management</b>                             |                            |                                   |
| Trial Oversight and Coordination                                                      | George Bigelow PhD         | 410-550-0035<br>bigelow@jhmi.edu  |
| <b>Assessment</b>                                                                     |                            |                                   |
| Project Coordinator;<br>Recruitment & Interview Team                                  | Kori Kindbom, MA           | 410-550-0984<br>kindbom@jhmi.edu  |
| Recruitment & Interview Team                                                          | Michael Sklar, MA          | 410-550-1542<br>msklar1@jhmi.edu  |
| Recruitment & Interview Team                                                          | Rachel Burns               | 410-550-1704<br>rschepis@jhmi.edu |
| Study Psychiatrist<br>Director of Delirium Assessment<br>and Delirium Consensus Panel | Karin Neufeld, MD          | 410-502-1169<br>kneufel2@jhmi.edu |
| Study Psychiatrist<br>Delirium Consensus Panel<br>member                              | Paul Rosenberg, MD         | 410-550-9883<br>prosenb9@jhmi.edu |
| Study Geriatrician<br>Delirium Consensus Panel<br>member                              | Esther Oh, MD              | 410-550-1318<br>eoh9@jhmi.edu     |
| <b>Study Design</b>                                                                   |                            |                                   |
| Clinical Trialist*                                                                    | Kay Dickersin, MA, PhD     | 410-502-4421<br>kdicker3@jhu.edu  |
| Clinical Trialist*                                                                    | Tianjing Li, MD, MHS, PHD  | 410-502-4630<br>tli19@jhu.edu     |
| Epidemiologist*                                                                       | L. Susan Wieland, MPH, PhD | swieland@som.maryland.edu         |
| Study Biostatistician                                                                 | Nae-Yuh Wang, PhD          | 410-955-3700<br>naeyuh@jhmi.edu   |

Appendix. STRIDE Protocol

| Data Safety Monitoring Board |                      |                                             |
|------------------------------|----------------------|---------------------------------------------|
| Chair                        | Jeffery Carson, M.D. | 732-235-7122<br>carson@umdnj.edu            |
| Medical Safety Officer       | Sarang Kim, MD, FACP | 732-235-7253<br>kimsa@umdnj.edu             |
| Anesthesiologist             | Lee Fleisher, M.D.   | 215-662-3776<br>lee.fleisher@uphs.upenn.edu |
| Psychiatry                   | Steve Epstein, M.D.  | 202-784-0682<br>epsteins@gunet.georgetown   |
| Epidemiologist               | Jay Magaziner, PhD   | jmagazin@epi.umaryland.edu                  |
| Biostatistician              | Anne Lindblad, PhD   | alindblad@emmes.com                         |

\* Worked on the design of the trial in Year 01.

**5b. Name and contact information for the trial sponsor**

NIA program officer:  
Molly Wagster  
301-496-9350  
wagsterm@nia.nih.gov

**5c. Role of study sponsor and funder**

The program officer or other representative of the NIA attends open session of the Data and Safety Monitoring Board (DSMB) meetings. The study sponsor (i.e., NIA) has no other roles in study design; collection, management, and interpretation of data; writing of the report; or the decision to submit the report for publication.

**5d. Composition, roles, and responsibilities of the individuals overseeing the trial**

The Study management structure comprises two standing committees: the STRIDE Investigators Executive Committee and the DSMB. Study operations are carried out under the direction of the STRIDE Investigators Executive Committee, which is comprised of the PI and respective individuals supervising cognitive assessments (KN), data management/data analysis (NYW), and clinical trial oversight (GB).

The responsibilities of the STRIDE Investigators Executive Committee include:

- Review and approve the procedures for the conduct of the study, including: recruitment and treatment procedures, data collection procedures and forms, data management and analysis procedures, and the Manual of Procedures (MOP);
- Approve major changes in the above;
- Set priorities;
- Review study progress (including recruitment) and take action to correct deficiencies;
- Resolve technical issues that arise during the execution of the trial;
- Resolve operational problems brought to the committee by members of the STRIDE staff
- Take action on advice from the DSMB concerning the continuation and conduct of the trial, including recommendations concerning premature termination because of evidence of harmful or beneficial results;
- Ensure confidentiality of participant data;
- Review and approve ancillary studies, and provide oversight for publication of study findings.

The PI of STRIDE is responsible for clinical oversight of the trial. Specific duties include:

- Organize and conduct training sessions for physicians;
- Advise and oversee clinical aspects of the study protocol and data collection;
- Resolve all technical questions with regard to treatment and complications;

## Appendix. STRIDE Protocol

- 56 • Survey the published literature on use of light sedation for hip fracture surgery in the elderly in an  
57 ongoing fashion and report any critical information promptly to the STRIDE Investigators  
58 Executive Committee;
- 59 • Communicate with both intervention and assessment personnel regarding recruitment and other  
60 issues;
- 61 • Provide representation to the STRIDE Investigators Executive Committee and DSMB;
- 62 • Ensure confidentiality of patient data;
- 63 • Assist with development of study documents, including data collection forms, MOP, and study  
64 reports;
- 65 • Prepare and distribute minutes of STRIDE Investigators Executive Committee;
- 66 • Prepare all necessary reports for NIA and study committees;
- 67 • Collaborate and take a leadership role in the preparation of scientific reports for publication;
- 68 • Provide arrangements for all committee meetings, including the STRIDE Investigators Executive  
69 Committee and DSMB meetings;
- 70 • Manage financial contracts; and
- 71 • Provide reimbursement to STRIDE staff for pre-approved study travel.
- 72 • Ensure that masking is maintained throughout study.

73

74 The responsibilities of Trial Oversight and Coordination are:

- 75 • Provide scientific expertise in the design and operation of STRIDE;
- 76 • Provide representation to the STRIDE Investigators Executive Committee and the DSMB;
- 77 • Prepare, maintain, and distribute study documents such as the MOP and forms;
- 78 • Provide facilities and staff to carry out analyses designed to monitor performance of the STRIDE  
79 clinical center, including patient recruitment and eligibility;
- 80 • Supervise and monitor performance of STRIDE data collection, processing, and analysis  
81 procedures;
- 82 • Prepare analyses of study data, including interim analyses for the DSMB and study monitoring;
- 83 • Ensure confidentiality of participant data;
- 84 • Respond to day-to-day clinical center needs regarding data collection and protocol administration;
- 85 • Collaborate and take a leadership role in the preparation of scientific reports for publication.
- 86 • Prepare and distribute meeting minutes for the DSMB;
- 87 • Serve as the official STRIDE archive;
- 88 • Develop and maintain a storage system for all study documents;
- 89 • Develop and implement a data storage system with security and backup features for all study  
90 data;
- 91 • Prepare all necessary adverse events reports for the NIA, Institutional Review Board (IRB), and  
92 DSMB.
- 93 • Prepare training materials related to the study;
- 94 • Train clinical center staff in study methods and procedures related to data collection and  
95 procedures designed to minimize bias;
- 96 • Coordinate certification of clinical center and study staff
- 97 • Develop and implement quality assurance and control monitoring programs.

98

99 Data Management responsibilities include:

- 100 • Design and development of all data systems related to the study;
- 101 • Software training related to data entry and software system use;
- 102 • Maintain computerized master file of edited study data
- 103 • Maintain audit trail of all study data.
- 104 • Generate patient randomization assignments and oversee the system for central randomization;
- 105 • Generate patient emergency randomization envelopes for the Study Anesthesiologist/Anesthetist  
106 to use as backup to the electronic system;
- 107 • Provide facilities and staff to assist Study Biostatistician carrying out analyses designed to  
108 monitor performance of the STRIDE clinical center, including patient recruitment and eligibility;
- 109 • Provide facilities and staff to assist Study Statistician preparing frozen data sets for interim  
110 analyses for the DSMB and other study monitoring, as well as analyses for publication; and

## Appendix. STRIDE Protocol

- 111 • Collaborate in the preparation of scientific reports for publication.
- 112 • Provide and support a data storage system with security and backup features for all study data;
- 113 and
- 114 • Collaborate, as needed, in the preparation of all necessary reports for the NIA and study
- 115 committees.

116

117 The Intervention Team has the following responsibilities:

- 118 • Complete appropriate forms on all potentially eligible patients screened for participation;
- 119 • Verify the pre-randomization eligibility of all patients enrolling in the trial, including the patient's
- 120 willingness to accept the randomized treatment assignment;
- 121 • Perform randomization procedures for patients eligible and willing to participate in the randomized
- 122 trial;
- 123 • Make the necessary preparations for providing the assigned treatment;
- 124 • Treat patients according to the randomized assignment;
- 125 • Maintain masking of patient's treatment assignment.

126

127 The Assessment Team is composed of the Recruitment & Interview Team and the Delirium Consensus  
128 Panel. The Recruitment & Interview Team has the following responsibilities:

- 129 • Attend ongoing STRIDE sessions on quality assurance, training, certification, and recertification
- 130 of personnel;
- 131 • Undergo certification and recertification procedures designed to maintain the quality of study
- 132 activities;
- 133 • Complete, enter and submit copies of data collection forms in an accurate and timely fashion;
- 134 • Maintain a roster and complete forms on all potentially eligible patients screened for participation;
- 135 • Verify the pre-randomization eligibility of all patients enrolling in the trial, including the patient's
- 136 willingness to accept the randomized treatment assignment;
- 137 • Carry out the patient education and consent process;
- 138 • Follow the recruited patients using prescribed STRIDE follow-up procedures;
- 139 • Ensure confidentiality of patient data; and
- 140 • Provide input during consensus panel meetings.

141

142 The Assessment Team leader has the following responsibilities:

- 143 • Train research staff in administration of the delirium and dementia assessment instruments,
- 144 including
  - 145 ○ Mini Mental State Examination (MMSE);
  - 146 ○ Confusion Assessment Method (CAM);
  - 147 ○ Delirium Rating Scale, Revised, 1998 (DRS-R-98);
  - 148 ○ Clinical Dementia Rating (CDR);
  - 149 ○ Mini-Mental State Exam (MMSE);
  - 150 ○ Abbreviated Digit Span Test (DST); and
  - 151 ○ Geriatric Depression Scale (GDS).
- 152 • Conduct quality assurance for CAM and DRS-R-98 ratings;

153

154 Responsibilities of the Delirium Consensus Panel includes:

- 155 • Review all participant delirium testing and finalize participant delirium outcome classification and
- 156 ascertainment.

157

### 158 **5e. Study team eligibility**

159 STRIDE certification is required for intervention and Assessment Team members. All study personnel  
160 requesting certification must attend training sessions conducted by the STRIDE Investigators Executive  
161 Committee. The training will include information about the study protocol, procedures, form completion,  
162 and data entry, as well as basic concepts of research and bioethics.

163

164 All study personnel requesting certification must read the MOP, review data collection forms, complete  
165 the Knowledge Assessment Test, and read and sign the Commitment to Maintain Study Masking. All  
166 study personnel must complete the Human Subjects Research and the Health Insurance Portability and

167 Accountability Act (HIPAA) certification courses as required by the local IRB and submit the certification of  
168 completion to the Johns Hopkins IRB.

169  
170 Certification requirements for personnel taking on a specific role are summarized in the MOP. In brief,  
171 intervention team members must be able to provide spinal anesthesia using STRIDE protocol;  
172 Assessment Team members must be trained to administer standardized psychiatric and functional  
173 measurements and be trained to complete study forms. Trial Oversight and Coordination is responsible  
174 for implementation and maintenance of all certification procedures. All certification documentation is  
175 submitted to Trial Oversight and Coordination, who is responsible for recommending and documenting  
176 certification.

## 177

### 178 **6. Introduction**

#### 179 **6a. Background and rationale**

180 The incidence of delirium in elderly patients after major elective surgery has been estimated at 10%, but  
181 appears to be higher following cardiac surgery and hip fracture repair<sup>1</sup>. Incident delirium is an important  
182 predictor of longer hospital stay and increased health costs<sup>2</sup>. Overall, 2-3 million elderly patients per year  
183 sustain delirium during their hospital stay, involving more than 17.5 million inpatient days and accounting  
184 for more than \$4 billion in Medicare expenditures<sup>3</sup>.

185  
186 The mainstay of delirium management is prevention by control and/or elimination of modifiable risk  
187 factors. One such risk factor may be sedative medications, where both drug selection and dosage can be  
188 modified. The role of sedative medications as iatrogenic risk factors for delirium has been described in  
189 ICU patients<sup>4</sup>. It seems logical that the management of intraoperative sedation would be an important  
190 modifiable risk factor to target; however, little work has been done in this area.

#### 191

#### 192 **6b. Explanation for choice of comparator**

193 The question of whether light vs. deep sedation can decrease the risk of postoperative delirium was  
194 examined in a recent randomized double masked trial<sup>5</sup>. Briefly, 114 hip fracture patients underwent spinal  
195 anesthesia with propofol sedation. Level of sedation was assessed by monitoring the Bispectral index  
196 (BIS). Patients were randomized to one of two intraoperative sedation levels: Light sedation was defined  
197 by a BIS  $\geq$ 80. Heavy sedation was defined by a BIS of approximately 50. Randomization was stratified by  
198 MMSE score and age. Patients were assessed daily for postoperative delirium in hospital using CAM and  
199 MMSE. The study demonstrated that in this high risk population, light sedation decreased the prevalence  
200 of postoperative delirium on postoperative days 2-5 by 50% compared with heavy sedation (19% in light  
201 sedation group versus 40% in the heavy sedation group). The effect was associated with a mean  
202 reduction of almost one day of delirium for the light sedation group. This study points to the role of  
203 excessive sedation during the perioperative period as a risk factor for delirium in highly vulnerable  
204 populations.

205  
206 Patients in the above-mentioned trial were followed for up to 3 years postoperatively for mortality.  
207 Mortality in subgroups of participants with and without postoperative delirium and subgroups of  
208 participants receiving light versus deep sedation were compared using Kaplan-Meier analysis. Patients  
209 sustaining postoperative delirium had a higher mortality rate than those without delirium ( $p=0.036$ , Cox-  
210 Mantel). There was a trend towards higher mortality in patients undergoing deep sedation, but this trend  
211 did not reach significance ( $p=0.485$ ), as the sample size and duration of follow-up were inadequate to  
212 determine this outcome with certainty.

#### 213

### 214 **7. Objective**

215 The principal objective is to assess the effectiveness of light versus heavy sedation during surgery in  
216 elderly patients undergoing hip fracture repair.

#### 217

### 218 **8. Trial design**

219 STRIDE is a randomized, two-group, parallel, superiority trial. The primary outcome is the impact of the  
220 intervention on the incidence of delirium during postoperative Day 1 to Day 5 or to hospital discharge,  
221 whichever occurs first. The secondary outcomes are mortality at one year (12 months) after surgery,  
222 delirium at 1-month (30 days), and in-hospital delirium at 1-5 days stratified by baseline co-morbidities.

## Appendix. STRIDE Protocol

223 Other outcomes include (1) change in functional outcomes from pre-operative test to 1-month and 12-  
224 month follow-up: activities of daily living (ADL) and instrumental ADL (IADL); grip strength; timed chair  
225 rise; and timed 3-meter walk; and (2) change in clinical dementia rating between the pre-operative test  
226 and 12-month follow-up.

227

228 The specific aims of the study as a whole are to:

- 229 • Develop and maintain a study team for the purpose of performing the randomized trial;
- 230 • Enroll eligible patients at JHBMC;
- 231 • Collect data on patients before, during, and after treatment using a standard set of procedures  
232 and forms;
- 233 • Assemble data for the comparison of the randomized treatment groups;
- 234 • Perform analyses of randomized patients to assess the effect of light sedation compared with  
235 heavy sedation on patient postoperative delirium;
- 236 • Perform analyses to assess the effect of treatment on secondary and other outcomes.

237

### 238 **9. Study setting**

239 STRIDE is conducted at a single clinical center (i.e., JHBMC), a tertiary care hospital.

240

### 241 **10. Recruitment**

242 All patients posted for traumatic hip fracture surgery at JHBMC are reviewed by a member of the  
243 intervention team for potential eligibility for STRIDE. Potentially eligible participants are screened and  
244 interviewed by a recruitment & intervention team member concerning choice of anesthesia. Family  
245 members or other legally authorized caregivers may also be interviewed as necessary. If the patient  
246 chooses spinal anesthesia then a member of the recruitment/interview team will interview and screen the  
247 potential subject.

248

### 249 **11. Eligibility criteria**

250 Inclusion criteria:

- 251 • Admitted to JHBMC;
- 252 • Posted to the operating room schedule for traumatic hip fracture surgery, that is a surgery to  
253 repair a fracture of femoral neck, intratrochanteric or subtrochanteric as the result of trauma;
- 254 • Is 65 years of age or older;
- 255 • Speaks and understands English sufficiently well to answer questions related to STRIDE (and  
256 reads English at least at a 5<sup>th</sup> grade level).

257

258 Exclusion criteria:

259 Participant has the following type of fracture/condition:

- 260 • Hip fracture that is not a result of trauma;
- 261 • Hip fractures in both hips on this admission, as determined by x ray;
- 262 • Non-hip fracture (e.g., vertebral fracture, humerus fracture) that will be surgically repaired at the  
263 same time as the hip fracture; or
- 264 • Prior hip surgery within 5 years on the same hip as the one to be operated on.

265

266 Participant had the following types of prescriptions

- 267 • Clopidogrel 7 days prior to surgery (or based on clinical judgment using information provided by  
268 the participant and the participant's family or caregiver that the participant took Clopidogrel 7 days  
269 prior to surgery);
- 270 • Ticlopidine within 14 days prior to surgery (or based on clinical judgment using information  
271 provided by the participant and the participant's family or caregiver that the participant took  
272 Ticlopidine within 14 days prior to surgery);
- 273 • Glycoprotein IIB/IIIa inhibitors (or based on clinical judgment using information provided by the  
274 participant and the participant's family or caregiver that the participant took glycoprotein IIB/IIIa  
275 inhibitors within 48 hours prior to surgery); or

## Appendix. STRIDE Protocol

- 276 • Fonduparinix within 48 hours prior to surgery (or based on best clinical judgment using  
277 information provided by the participant and the participant's family or caregiver that the participant  
278 took Fonduparinix within 48 hours prior to surgery).  
279

280 Participant has the following medical history/current medical condition:

- 281 • Very severe chronic obstructive pulmonary disease per the Global Initiative for Chronic  
282 Obstructive Lung Disease (GOLD) Executive Summary Statement as follows:  
283 1. Post-bronchodilator FEV1 < 30% predicted or FEV1 < 50% predicted plus chronic respiratory  
284 failure. Chronic respiratory failure is defined as PaO<sub>2</sub> < 60 mm Hg with or without PaCO<sub>2</sub> > 50  
285 mm Hg while breathing air at sea level.  
286 2. Post-bronchodilator FEV1/FVC < 0.70;  
287 • Stage IV heart failure by The New York Heart Association Functional Classification;  
288 • Requires ventilation and intubation at the time of surgery;  
289

290 Participant has the following lab test results:

- 291 • International Normalized Ratio test value  $\geq 1.4$ ;  
292 • Aortic stenosis, defined by the American Society of Regional Anesthesia as both an aortic valve  
293 area < 0.8 cm<sup>2</sup> AND a mean aortic gradient of > 50 mm Hg;  
294

295 Participant has the following scores (mental status criteria):

- 296 • MMSE < 15;  
297 • A delirium diagnosis at baseline;  
298

### 299 **12. Interventions**

300 After enrollment and satisfactory administration of spinal anesthesia, the patient will be assigned to one of  
301 two groups at random. Randomization will be performed by a web-based system constructed by the ICTR  
302 at the JHBMC under the supervision of Dr. Kerry Stewart, in conjunction with the study's biostatistician,  
303 Dr. Nae-Yuh Wang. Patients in both groups will receive the institutional standard of care pre-operatively  
304 (the preoperative analgesic regimens typically consist of intravenous opioids of either morphine or  
305 dilaudid).  
306

307 Intra-operatively, however, one group will have the depth of sedation (as measured by the use of the  
308 Observer's Assessment of Awareness / Sedation Scale [OAA/S]; see Table 1) maintained at an OAA/S  
309 score of 0-2. This will be the deep sedation group. Patients in the other group will have the depth of  
310 sedation maintained at an OAA/S score of 3-5. This will be the light sedation group. The propofol is  
311 titrated individually for each participant to achieve and maintain the depth of sedation required by that  
312 participant's assigned treatment group (light or heavy sedation). The depth of sedation for all participants  
313 is measured by the OAAS, administered every 15 minutes intra-operatively. Data on amount of propofol  
314 and OAAS score are recorded on the Intraoperative Data Form (Form 15). Summary information about  
315 anesthesia, pain, surgical times, and receipt of opioids during surgery and PACU stay is collected on the  
316 Anesthesia Data / PACU Summary Form (Form 16). Forms 15 and 16 must be stored separately from all  
317 other forms by the principal investigator, to maintain the masking of the treatment assignment.  
318

319 When the Study Anesthesiologist/Anesthetist determines the sedation level of a participant randomized to  
320 heavy sedation to be too light (an OAA/S score of 3 or greater), the infusion rate of propofol is increased  
321 by 10-20 mcg per kg per minute, and the sedation is reassessed 5 minutes later following the change in  
322 infusion rate. This sequence is repeated until a sedation level of 0-2 is obtained. Likewise, when the  
323 Study Anesthesiologist/Anesthetist determines the sedation level of a participant randomized to light  
324 sedation to be too heavy (an OAA/S score of less than 3), the propofol infusion rate is decreased in steps  
325 of 10-20 mcg per kg per minute at a time, with a 5-minute interval before repeating the sequence until an  
326 OAA/S score of 3 or greater is achieved.  
327

328 At the completion of the case, the intervention team member should obtain a printout from the anesthesia  
329 monitor in 5-minute intervals which include the following information: systolic and mean blood pressure,  
330 and bispectral index (BIS) values.

## Appendix. STRIDE Protocol

331

332 Problems with sedation protocol:

333 Too little sedation

- 334     ▪ an awake participant requesting more sedation; or
- 335     ▪ an agitated participant.

336 Protocol: The infusion rate of propofol is increased by 10-20 mcg per kg per minute, and  
337 the sedation is reassessed 5 minutes later following the change in infusion rate. This  
338 sequence is repeated until the patient is comfortable or agitation subsides.

339

340 Too much sedation,

- 341     ▪ inability of the participant to maintain an airway

342 Protocol: Placement of an oral or nasal airway is performed and the case is continued.

- 343     ▪ hypotension

344 Protocol: The initial treatment regimen includes a neosynephrine infusion titrated to  
345 obtain the desired blood pressure level. Other second-line drugs may include  
346 glycopyrrolate, ephedrine, or epinephrine, depending on the clinical circumstances. If the  
347 fall in systolic blood pressure persists despite these interventions, then the level of  
348 sedation is decreased by decreasing the dosage of the propofol infusion while continuing  
349 to manage the blood pressure accordingly.

350

351 If a participant does not complete the surgical and anesthesia protocol for any reason, or there is a  
352 deviation from the protocol, postoperative data are nevertheless collected. The Protocol Deviation Log  
353 (Form 50) will be used to document all information on protocol deviations, including deviations in  
354 administration of the study treatment. Clinical trial oversight will tabulate these protocol deviations to the  
355 DSMB in a tabulated report.

356

### 357 **13. Outcomes**

358 The primary outcome is the impact of the intervention on the incidence of delirium during post-operative  
359 Day 1 to Day 5 or to hospital discharge, whichever occurred first. We will evaluate delirium using  
360 validated instruments including the CAM, MMSE, Abbreviated DST, and DRS-R-98, followed by case-by-  
361 case diagnostic adjudication by the Delirium Consensus Panel. All delirium measurements are taken by a  
362 member of the Recruitment & Interview Team. Both the Delirium Consensus Panel and the Recruitment &  
363 Interview Team are masked to the treatment assignment.

364

365 A clinician qualifies to be on the Delirium Consensus Panel if they are a neurologist, psychiatrist,  
366 psychologist, or geriatrician with previous clinical experience in evaluating or managing delirium and the  
367 related research tools for its study. The quorum for the Delirium Consensus Panel should consist of a  
368 vote by all panel members. The Assessment Team leader will moderate the meeting.

369

370 To ensure the validity and consistency of delirium assessment, delirium consensus is performed on all in-  
371 hospital delirium assessments as well as the 1-month follow-up assessment on all study participants.  
372 Delirium Consensus Panel Members convene and make delirium diagnostic adjudication so that all in-  
373 hospital data and 1-month follow-up assessment can be analyzed at once.

374

375 Delirium data are always presented in the same structured format. Following presentation of the data, the  
376 respective Recruitment & Interview Team members should be available to answer questions concerning  
377 their observations.

378

379 Postoperative delirium will be defined in this study by criterion for delirium presented in the Diagnostic  
380 and Statistical Manual for Mental Disorders, 4th Edition as assessed on the CAM. Based on the CAM  
381 algorithm, the Delirium Consensus Panel will assign one of three possible ratings: No delirium, no criteria  
382 met; No delirium, but 1 or 2 criteria met; and Delirium, all 3 criteria met. Each voting member will vote to  
383 assign each hospital day or 1-month assessment. The majority vote will be considered the diagnosis and  
384 will be recorded on the Delirium Consensus Diagnosis Form (In-Hospital Visits) (Form 29A, Form 29A  
385 Supplement-DSMIV) and the Delirium Consensus Diagnosis Form (1-Month Follow-up Visits) (Form 29B,

386 Form 29B supplement-DSMIV).

387

388 **14. Sample size and power calculation**

389 Based upon a feasibility estimate of 4-year recruitment in a single center setting, sample size is expected  
390 to be 200 participants randomized in equal allocation into the two study groups. We expect full outcome  
391 observation for in-hospital delirium and 1-year mortality. A total of 176 participants are expected to  
392 complete 1-month follow-up, and the expected number for loss to follow-up at this study time point  
393 includes participants who die during the follow-up period.

394

395 STRIDE is designed to test the primary hypothesis that limiting sedation will lead to a lower risk of  
396 postoperative delirium in-hospital. Power evaluation was conducted through calculating the minimal  
397 detectable difference between the two treatment arms with 80% power for a 2-sided test based upon  
398 expected sample size of 200 and parameter estimates from pilot data obtained from the preliminary trial.  
399 Statistical power for the study was evaluated using PASS 2005.

400

401 We also evaluated minimal detectable difference for 1-year mortality between the two treatment arms for  
402 the main secondary hypothesis that limiting sedation will lead to a lower mortality over the next 12  
403 months. Multiple comparison adjustment was not performed for these evaluations.

404

405 **14a. Power to test in hospital risk of postoperative delirium**

406 We used data from the preliminary study<sup>5</sup> and the feasible total sample size of 200 within the study time  
407 frame to calculate the minimal detectable difference between the 2 treatment arms, as follows. In the  
408 preliminary randomized controlled trial<sup>5</sup>, there was a 55.6% decrease in postoperative delirium with light  
409 sedation. Assuming the risk of postoperative delirium in hospital for the deep sedation group as 39.6%,  
410 with a 2-sided alpha of 0.05 using the Fisher's exact test, we will have 80% power to detect an in hospital  
411 postoperative delirium rate of 18.5% or lower in the light sedation group, or a 53.3.0% reduction or more  
412 on the risk of postoperative delirium in the light sedation group compared to the risk in the deep sedation  
413 group. This is based on a sample size of 80 participants per group. Since we anticipate complete follow-  
414 up on the primary outcome, i.e. with 100 participants per group, we will be able to detect a postoperative  
415 delirium rate of 20.6% or lower in the light sedation group, or a 48.0% reduction or more on the risk of  
416 postoperative delirium in the light sedation group compared to the risk in the heavy sedation.

417

418 **14b. Power to test rate of mortality**

419 In the preliminary study<sup>5</sup>, the Kaplan Meier estimate for 1-year mortality was 31.5% for the deep sedation  
420 group, and 17.3% for the light sedation group. Assuming the risk of 1-year mortality of 31.5% for the deep  
421 sedation group and proportional hazards, we will have 80% power to detect the 1-year mortality rate of  
422 14.4% or lower, or a 17.1% or more absolute reduction in mortality, in the light sedation group. This is  
423 based on as sample size of 80 per group with a 2-sided alpha of 0.05 for a log rank test assuming  
424 proportional hazards. With a sample size of 100 per group and a 2-sided alpha of 0.05, we will have 80%  
425 power to detect a 1-year mortality rate of 16.0% or lower, or a 15.5% or more absolute reduction in  
426 mortality, in the light sedation group. We anticipate complete follow-up on mortality outcome at 1-year  
427 post randomization.

428

429 **15. Randomization**

430 **15a. Sequence generation**

431 In STRIDE, participants are randomized to either light or heavy sedation in a 1:1 ratio, i.e., the participant  
432 has an equal probability of assignment to either group. Randomization is stratified by dementia at  
433 baseline (MMSE score 15-23 versus MMSE score 24-30) and participant age (65-79 years versus 80+  
434 years). Dementia and age are baseline factors strongly and consistently associated with postoperative  
435 delirium. The Study Statistician generates the random sequence using a computer program.

436

437 **15b. Allocation concealment and implementation**

438 After baseline data is obtained, a member of the Recruitment & Interview Team enters eligibility data into  
439 the tracker/randomization website. After determining whether spinal anesthesia is possible, the Study  
440 Anesthesiologist/Anesthetist logs into the Randomization Database in the operating room using his or her  
441 Johns Hopkins (JHED) ID and enters the participant ID number into the Randomization Database. The

## Appendix. STRIDE Protocol

442 Randomization Database verifies eligibility and participant ID against existing participant ID numbers in  
443 the Randomization Database to prevent duplicate requests of assignment for the same participant ID.  
444

445 An emergency backup system is also provided for the unlikely possibility that the Randomization  
446 Database is completely inaccessible. The backup system is a set of numbered envelopes kept in four  
447 boxes for each of the four possible stratification groupings. These boxes of envelopes are stored in the  
448 PI's office. The intervention team member selects the box appropriate to the participant's age and MMSE  
449 score, then chooses the lowest envelope number available in that box (which should be the first envelope  
450 in the box). S/he checks off the envelope number on the front of the box, indicating the envelope has now  
451 been used and completes Section C on the front of the envelope and the enclosed Form 70. S/he places  
452 Form 70 in the envelope, seals it, and returns it to the data management team.  
453

454 All participants receive spinal anesthesia. Every attempt should be made to provide spinal anesthesia  
455 using propofol only. In most hip fracture patients, spinal anesthesia can be performed following a propofol  
456 bolus as needed of 10-50 mg. After enrollment and satisfactory administration of spinal anesthesia, the  
457 patient will be assigned to one of two groups at random; randomization will be performed by a web-based  
458 system constructed by the Institute for Clinical and Translational Research at JHBMC under the  
459 supervision of Dr. Kerry Stewart, in conjunction with the study's biostatistician, Dr. Nae-Yuh Wang.  
460

### 461 **16. Masking**

462 It is not practical to attempt intra-operative blinding of the intervention team in this study. With the  
463 exception of the Study Biostatistician and the Study Anesthesiologist/Anesthetist, all STRIDE team  
464 members -- including those assessing study outcomes, those treating the participant, and the participant  
465 and participant's family and caregivers -- will be masked as to treatment assignment until data have been  
466 analyzed and results reported. All data gathering and delirium/cognitive assessments will be performed  
467 by members of the STRIDE team who are masked to the participant's intraoperative level of sedation  
468 assignment. Masked study investigators must refrain from making any attempt to learn of a participant's  
469 anesthesia level (either assigned or received), which would result in the unmasking of the participant's  
470 treatment assignment.  
471

472 At the clinical center, only the Study Anesthesiologist/Anesthetist is unmasked, and is unmasked only in  
473 the case of his or her patients. The Study Anesthesiologist/Anesthetist must make every effort to maintain  
474 masking and thus not reveal a participant's anesthesia level (either assigned or received) to any  
475 participants involved in the study, or in any way that permits others to learn the participant's anesthesia  
476 level (either assigned or received). To maintain masking, the Study Anesthesiologist/Anesthetist will  
477 complete the anesthesia forms (Form 15 Intraoperative Data and Form 16 Anesthesia Data/PACU  
478 summary) and will maintain the forms at the clinical center for data entry. No other members of the study  
479 team will be able to view the anesthetic record. During the intraoperative study period, the BIS monitor  
480 readout will be covered so that the Study Anesthesiologist/Anesthetist remains masked to the BIS  
481 numbers while administering propofol so that assessment of depth of sedation during surgery is not  
482 influenced by knowledge of the BIS number. Details about masking during treatment are in the MOP.  
483 Unmasking is a protocol violation and will be recorded as such on the Protocol Deviation Form (Form 50).  
484

### 485 **18. Data collection, management, and analysis**

486 Sequence of Form Completion in STRIDE

487 (all forms available at: \\Jhbcrufs1\protocoldata\Active\STRIDE\Admin\Forms\LiveFormsByVisit)

| Form number and name                                                           | When form completed                                      | Information taken from                                | Who completes form                  |
|--------------------------------------------------------------------------------|----------------------------------------------------------|-------------------------------------------------------|-------------------------------------|
| Form 1 Registration log<br>Form 2 Eligibility<br>Screening (Section A<br>only) | When patient is posted<br>for the Operating Room<br>(OR) | Electronic medical<br>record                          | Assessment<br>Team/Anesthesiologist |
| Form 2B Medication<br>(anticoagulant screen)                                   | Morning of surgery,<br>before consent                    | Electronic medical<br>record and patient<br>interview | Assessment Team                     |
| Form 3 MMSE                                                                    | Morning of surgery,                                      | Patient                                               | Assessment Team                     |

Appendix. STRIDE Protocol

|                                                                                                                                          |                                                                                                                  |                                                                |                                  |
|------------------------------------------------------------------------------------------------------------------------------------------|------------------------------------------------------------------------------------------------------------------|----------------------------------------------------------------|----------------------------------|
|                                                                                                                                          | before consent                                                                                                   |                                                                |                                  |
| Form 4 Digit Span                                                                                                                        | Morning of surgery, before consent                                                                               | Patient                                                        | Assessment Team                  |
| Form 22 MMSE and DST Over Time                                                                                                           | Morning of surgery, before consent                                                                               | Completed assessments                                          | Assessment Team                  |
| Form 5 CAM                                                                                                                               | Morning of surgery, before consent                                                                               | Patient                                                        | Assessment Team                  |
| Form 02 Eligibility Screening (Sections B-G)                                                                                             | Morning of surgery, before consent                                                                               | Forms 06, 07, 20, 24                                           | Anesthesiologist                 |
| Form 40A Evaluation to sign consent                                                                                                      | Morning of surgery, before consent                                                                               | Patient and/or legally authorized representative (LAR)         | Assessment Team                  |
| Informed consent (Form 40)                                                                                                               | Morning of surgery, completion accomplishes consent                                                              | Patient and/or LAR                                             | Assessment Team                  |
| <b>CONSENT</b>                                                                                                                           |                                                                                                                  |                                                                |                                  |
| Form 12 DRS-R-98                                                                                                                         | Morning of surgery                                                                                               | Patient                                                        | Assessment Team                  |
| Form 13 CDR                                                                                                                              | Morning of surgery                                                                                               | Patient                                                        | Assessment Team                  |
| Form 8 ADL                                                                                                                               | Morning of surgery                                                                                               | Patient                                                        | Assessment Team                  |
| Form 9 IADL                                                                                                                              | Morning of surgery                                                                                               | Patient                                                        | Assessment Team                  |
| Form 6 Geriatric Depression Scale                                                                                                        | Morning of surgery                                                                                               | Patient                                                        | Assessment Team                  |
| Form 10 Medication History                                                                                                               | Morning of surgery                                                                                               | Electronic medical record                                      | Assessment Team                  |
| Form 11 Baseline                                                                                                                         | Morning of surgery                                                                                               | Patient                                                        | Assessment Team                  |
| Form 41 Patient Contact Form                                                                                                             | Morning of surgery                                                                                               | Patient/Informant                                              | Assessment Team                  |
| Form 7 Charlson Comorbidity Index                                                                                                        | Morning of surgery, before randomization                                                                         | Electronic medical record                                      | Assessment Team/Anesthesiologist |
| Form 70 Emergency Envelope Use: Incident Report                                                                                          | Morning of surgery, at time of randomization, but only if web-based randomization is not used.                   | Person filling out form provides information                   | Anesthesiologist                 |
| <b>RANDOMIZATION</b>                                                                                                                     |                                                                                                                  |                                                                |                                  |
| Form 15 Intraoperative Data                                                                                                              | During surgery                                                                                                   | Monitors in operating room                                     | Anesthesiologist                 |
| Form 17 Surgery Data Form                                                                                                                | After surgery, within one week                                                                                   | X-rays, electronic medical record (surgery notes)              | Surgeon                          |
| Form 16 Anesthesia/PACU Summary                                                                                                          | At discharge from post-anesthesia care unit (PACU)                                                               | Anesthesia record and electronic medical record                | Anesthesiologist                 |
| Form 10 Medication<br>Form 3 MMSE<br>Form 12 DRS-R-98<br>Form 5 CAM<br>Form 4 DST<br>Form 22 MMSE and DST Over Time<br>Form 29A Delirium | Day 1 Post-operation and each hospital day after until Day 5-post operation or discharge (whichever comes first) | Electronic medical record<br>Patient<br>Nurse/Family/Informant | Assessment Team                  |

Appendix. STRIDE Protocol

|                                                                                                                                                                                                                                                                                                    |                                                                         |                                                      |                                        |
|----------------------------------------------------------------------------------------------------------------------------------------------------------------------------------------------------------------------------------------------------------------------------------------------------|-------------------------------------------------------------------------|------------------------------------------------------|----------------------------------------|
| Consensus Form                                                                                                                                                                                                                                                                                     |                                                                         |                                                      | Consensus Panel                        |
| Form 10 Medication<br>Form 3 MMSE<br>Form 12 DRS-R-98<br>Form 5 CAM<br>Form 6 Geriatric Depression Scale<br>Form 8 ADL<br>Form 9 IADL<br>Form 4 DST<br>Form 7 Charlson Comorbidity Index<br>Form 21 Functional Outcomes Form<br>Form 22 MMSE and DST Over Time<br>Form 29B Delirium Consensus Form | At one-month clinic or home visit                                       | Patient                                              | Assessment Team<br><br>Consensus Panel |
| Form 19 Hospitalization and 30-Days Postoperative Complications                                                                                                                                                                                                                                    | At 30 days after surgery                                                | Electronic medical record<br>Patient                 | Assessment Team/Anesthesiologist       |
| Form 20 Telephone contact log                                                                                                                                                                                                                                                                      | Month 2 through Month 11                                                | Patient                                              | Assessment Team                        |
| Form 6 Geriatric Depression Scale<br>Form 3 MMSE<br>Form 4 DST<br>Form 8 ADL<br>Form 9 IADL<br>Form 12 DRS-R-98<br>Form 5 CAM<br>Form 7 Charlson Comorbidity Index<br>Form 13 CDR<br>Form 21 Functional Outcomes Form<br>Form 22 MMSE and DST Over Time<br>Form 32 Study Closeout Form             | At one year (home or clinic visit)                                      | Patient                                              | Assessment Team                        |
| Form 31 Early Termination Form                                                                                                                                                                                                                                                                     | When patient dies, leaves study or is lost to follow-up before one-year |                                                      | Assessment Team                        |
| Form 30 Adverse Event Form                                                                                                                                                                                                                                                                         | Any time during or after intervention that there is an AE               | Electronic medical record and person completing form | Assessment Team or Anesthesiologist    |

488

| <b>Forms not in sequence of study (administrative forms)</b> |                          |
|--------------------------------------------------------------|--------------------------|
| <b>Form #</b>                                                | <b>Form name</b>         |
| Form 50                                                      | Protocol Deviation Log   |
| Form 17                                                      | Staff Training Log Sheet |

489

490

491 **The following forms are completed during screening**

- 492 • Registration Log
- 493 • Eligibility Screening Form - Part A (Form 02A);
- 494 • Eligibility Screening Form - Part B (Form 02B);
- 495 • MMSE Form, Form (Form 03);
- 496 • Abbreviated DST and Pain Score (Form 04); and
- 497 • CAM Form (Form 05).

498  
499 If the participant meets eligibility criteria for the Study, consent to participate is sought. If the patient is not  
500 capable of consenting, we will obtain consent from a legal guardian. We will also administer an  
501 “Evaluation of Ability To Give Informed Consent” (Form 40A) to the patient or to the legal guardian before  
502 obtaining written consent. A member of the Assessment Team will obtain consent from the patient /  
503 guardian and enroll the patient in the research study. If the patient is unable to give informed consent,  
504 then the Assessment Team member will seek informed consent from the appropriate family member or  
505 guardian. Note that all persons seeking to acquire informed consent will have taken and passed a  
506 credentialing test (Form 60) demonstrating knowledge of the STRIDE study and protocol.

507  
508 If the patient consents to participate in the study, the Baseline Visit is conducted. During the Baseline Visit  
509 the following forms are completed. In the rare situation that the patient is taken to the OR emergently, the  
510 baseline forms (with the exception of the Geriatric Depression Scale) may be completed with the patient’s  
511 family member/significant other or with the patient following surgery.

- 512
- 513 • Geriatric Depression Scale, Short Form (Mood Scale) (Form 06);
- 514 • Charlson Comorbidity Index Form (Form 07);
- 515 • ADL Form (Form 08);
- 516 • IADL Form (Form 09);
- 517 • Medication History Form (Form 10);
- 518 • Baseline Interview Form (Form 11);
- 519 • DRS-R98 Form (Form 12);
- 520 • CDR Form (Form 13); and
- 521 • Participant Locator Form (Form 41)

522  
523 **Participant assessment during hospitalization**

524 The Assessment Team will complete the forms outlined in the table below for all enrolled participants on a  
525 daily basis, beginning on the day after surgery and continuing through postoperative Day 5 or hospital  
526 discharge, whichever comes first. When the participant is discharged from the hospital, the  
527 Hospitalization Details at Discharge Form (Form 18) should be completed.

528  
529 **Participant assessment following hospitalization**

530 The first scheduled follow-up visit after hospital discharge in STRIDE occurs 30 days postoperatively. The  
531 time window for the 1-month follow-up visit is 2 weeks. Visits outside the time window are counted as  
532 protocol deviations. The forms completed at this visit are listed in the table below.

533  
534 Follow-up telephone calls are conducted with all randomized participants over a period of 12 months (1  
535 year) post-surgery. Telephone calls begin at 2 months post-surgery and occur at monthly intervals  
536 thereafter until month 11. At each telephone follow-up call, participants are asked where they are  
537 currently living, whether there have been any changes in their health status since the last telephone call,  
538 and whether there have been changes in the contact information for the people listed on the Participant  
539 Locator Form (Form 41). This information is recorded on the Participant Telephone Contact Form (Form  
540 20). Contact attempts are recorded on the Contact Log (Form 55). The time window for the monthly  
541 follow-up calls is two weeks, and any call not taking place within this window is considered a late  
542 telephone visit. Participants may also completely miss a telephone call. Participants who “miss” two  
543 consecutive follow-up calls are considered “inactive” until they are reinstated. Efforts to reinstate inactive  
544 participants should be pursued vigorously.

545

Appendix. STRIDE Protocol

546 The second scheduled follow-up after hospital discharge in STRIDE is 1 year postoperatively (the 12-  
 547 month follow-up visit). The time window for the 12-month visit is 4 weeks. Visits outside the time window  
 548 are counted as protocol departures. The forms completed at this visit are listed in the table below.  
 549

550 Although there are no required clinical center visits between the 1-month follow-up visit and the 12-month  
 551 follow-up visit, it is expected that some randomized participants may have additional visits, "Unscheduled  
 552 Visits or Hospitalization," for re-hospitalization, adverse events or other reasons. The Recruitment &  
 553 Interview Team is not required to collect specific data on these visits, unless a participant death occurs or  
 554 the participant withdraws consent.  
 555

556 If any STRIDE visit or telephone follow-up contact is missed and will not be completed, a Missed Forms  
 557 or Visit Form (Form 52) must be completed as well as a Protocol Deviation Form (Form 50).  
 558

559 If, at any time, the participant cannot be located, an intensive search should be instituted immediately,  
 560 even if the participant has not missed a visit. The steps taken to locate the participant should be  
 561 documented. If a participant cannot be located, the STRIDE Investigators Executive Committee reviews  
 562 the participant's record and formulates recommendations for action.  
 563

564 As soon as the Recruitment & Interview Team personnel become aware that a participant has died, a  
 565 Notice of Early Termination or Death Form (Form 31) must be completed. The Study Closeout Form  
 566 (Form 32) must also be completed. If the death occurs within 30 days of the Study surgery, an Adverse  
 567 Event Report Form (Form 30) must be completed.  
 568

| <b>Follow-up Visits for Participants in STRIDE</b> |                                                                                                                                                                                                                                                                                                                                                                                                                                                                                                                                                                                                                                        |                                                                     |
|----------------------------------------------------|----------------------------------------------------------------------------------------------------------------------------------------------------------------------------------------------------------------------------------------------------------------------------------------------------------------------------------------------------------------------------------------------------------------------------------------------------------------------------------------------------------------------------------------------------------------------------------------------------------------------------------------|---------------------------------------------------------------------|
| <b>Visit</b>                                       | <b>Form Required</b>                                                                                                                                                                                                                                                                                                                                                                                                                                                                                                                                                                                                                   | <b>When</b>                                                         |
| Day 1-5 After Surgery                              | <ul style="list-style-type: none"> <li>• MMSE Form (Form 03)</li> <li>• Abbreviated DST and Pain Score Form (Form 04)</li> <li>• CAM Form (Form 05)</li> <li>• MMSE and DST Scores Over Time (Form 22)</li> <li>• Medication History Form (Form 10)</li> <li>• DRS-R-98 Form (Form 12)</li> </ul>                                                                                                                                                                                                                                                                                                                                      | Each inpatient day 1-5 following surgery, until hospital discharge. |
| Hospital Discharge                                 | <ul style="list-style-type: none"> <li>• Hospitalization Details at Discharge Form (Form 18)</li> </ul>                                                                                                                                                                                                                                                                                                                                                                                                                                                                                                                                | At participant discharge.                                           |
| 1-Month Follow-up Visit                            | <ul style="list-style-type: none"> <li>• MMSE Form (Form 03)</li> <li>• Abbreviated DST and Pain Score Form (Form 04)</li> <li>• CAM Form (Form 05)</li> <li>• MMSE and DST Scores Over Time (Form 22)</li> <li>• Geriatric Depression Scale, Short Form (Mood Scale) (Form 06)</li> <li>• Charlson Comorbidity Index Form (Form 07)</li> <li>• ADL Form (Form 08)</li> <li>• IADL Form (Form 09)</li> <li>• Medication History Form (Form 10)</li> <li>• DRS-R-98 Form (Form 12)</li> <li>• 30-day Postoperative Occurrences Form (Form 19)</li> <li>• Functional Outcomes Form (Form 21)</li> <li>• Contact Log (Form 55)</li> </ul> | 30 days after surgery                                               |
| Month 2 After Surgery                              | <ul style="list-style-type: none"> <li>• Contact Log (Form 55)</li> <li>• Participant Telephone Contact Form (Form 20)</li> </ul>                                                                                                                                                                                                                                                                                                                                                                                                                                                                                                      | Two months after surgery                                            |
| Month 3 After Surgery                              | <ul style="list-style-type: none"> <li>• Contact Log (Form 55)</li> <li>• Participant Telephone Contact Form (Form 20)</li> </ul>                                                                                                                                                                                                                                                                                                                                                                                                                                                                                                      | Three months after surgery                                          |
| Month 4 After                                      | <ul style="list-style-type: none"> <li>• Contact Log (Form 55)</li> </ul>                                                                                                                                                                                                                                                                                                                                                                                                                                                                                                                                                              | Four months after                                                   |

Appendix. STRIDE Protocol

|                          |                                                                                                                                                                                                                                                                                                                                                                                                                                                                                                                                                                                               |                             |
|--------------------------|-----------------------------------------------------------------------------------------------------------------------------------------------------------------------------------------------------------------------------------------------------------------------------------------------------------------------------------------------------------------------------------------------------------------------------------------------------------------------------------------------------------------------------------------------------------------------------------------------|-----------------------------|
| Surgery                  | <ul style="list-style-type: none"> <li>Participant Telephone Contact Form (Form 20)</li> </ul>                                                                                                                                                                                                                                                                                                                                                                                                                                                                                                | surgery                     |
| Month 5 After Surgery    | <ul style="list-style-type: none"> <li>Contact Log (Form 55)</li> <li>Participant Telephone Contact Form (Form 20)</li> </ul>                                                                                                                                                                                                                                                                                                                                                                                                                                                                 | Five months after surgery   |
| Month 6 After Surgery    | <ul style="list-style-type: none"> <li>Contact Log (Form 55)</li> <li>Participant Telephone Contact Form (Form 20)</li> </ul>                                                                                                                                                                                                                                                                                                                                                                                                                                                                 | Six months after surgery    |
| Month 7 After Surgery    | <ul style="list-style-type: none"> <li>Contact Log (Form 55)</li> <li>Participant Telephone Contact Form (Form 20)</li> </ul>                                                                                                                                                                                                                                                                                                                                                                                                                                                                 | Seven months after surgery  |
| Month 8 after surgery    | <ul style="list-style-type: none"> <li>Contact Log (Form 55)</li> <li>Participant Telephone Contact Form (Form 20)</li> </ul>                                                                                                                                                                                                                                                                                                                                                                                                                                                                 | Eight months after surgery  |
| Month 9 After Surgery    | <ul style="list-style-type: none"> <li>Contact Log (Form 55)</li> <li>Participant Telephone Contact Form (Form 20)</li> </ul>                                                                                                                                                                                                                                                                                                                                                                                                                                                                 | Nine months after surgery   |
| Month 10 After Surgery   | <ul style="list-style-type: none"> <li>Contact Log (Form 55)</li> <li>Participant Telephone Contact Form (Form 20)</li> </ul>                                                                                                                                                                                                                                                                                                                                                                                                                                                                 | Ten months after surgery    |
| Month 11 After Surgery   | <ul style="list-style-type: none"> <li>Contact Log (Form 55)</li> <li>Participant Telephone Contact Form (Form 20)</li> </ul>                                                                                                                                                                                                                                                                                                                                                                                                                                                                 | Eleven months after surgery |
| 12-Month Follow-up Visit | <ul style="list-style-type: none"> <li>MMSE Form (Form 03)</li> <li>Abbreviated DST and Pain Score Form (Form 04)</li> <li>CAM Form (Form 05)</li> <li>MMSE and DST Scores Over Time (Form 22)</li> <li>Geriatric Depression Scale, Short Form (Mood Scale) (Form 06)</li> <li>Charlson Comorbidity Index Form (Form 07)</li> <li>ADL Form (Form 08)</li> <li>IADL Scale Form (Form 09)</li> <li>DRS-R-98 Form (Form 12)</li> <li>CDR Form (Form 13)</li> <li>Functional Outcomes Form (Form 21)</li> <li>Study Closeout Form (Form 32)</li> <li>Medication History Form (Form 10)</li> </ul> | Twelve months after surgery |

569  
570  
571  
572  
573  
574  
575  
576  
577  
578  
579  
580  
581  
582  
583  
584  
585  
586  
587  
588  
589  
590  
591  
592  
593

**Overview of testing points:**

| Assessment                 | Time Point |                     |         |        |
|----------------------------|------------|---------------------|---------|--------|
|                            | Pre-op     | POD1 and thereafter | 1-month | 1-year |
| MMSE                       | x          | x                   | x       | x      |
| DST                        | x          | x                   | x       | x      |
| DRS-R-98                   | x          | x                   | x       | x      |
| CAM                        | x          | x                   | x       | x      |
| Geriatric Depression Scale | x          |                     | x       | x      |
| CDR                        | x          |                     |         | x      |
| IADL                       | x          |                     | x       | x      |
| ADL                        | x          |                     | x       | x      |
| Pain score                 | x          | x                   | x       | x      |

## Appendix. STRIDE Protocol

|     |                      |   |   |   |   |
|-----|----------------------|---|---|---|---|
| 594 |                      |   |   |   |   |
| 595 | Drug data            | x | x | x | x |
| 596 |                      |   |   |   |   |
| 597 | Co-morbidities       | x |   | x | x |
| 598 |                      |   |   |   |   |
| 599 | Hand grip            |   |   | x | x |
| 600 |                      |   |   |   |   |
| 601 | Walking speed        |   |   | x | x |
| 602 |                      |   |   |   |   |
| 603 | Chair stand speed    |   |   | x | x |
| 604 |                      |   |   |   |   |
| 605 | Pre-op: preoperative |   |   |   |   |
| 606 | PO: postoperative    |   |   |   |   |
| 607 |                      |   |   |   |   |

### 608 **18a. Data management**

609 Forms related to research study data are entered into a REDCap database developed for the STRIDE  
610 project (see [www.Project-REDCap.org](http://www.Project-REDCap.org) for more information on REDCap). The STRIDE REDCap  
611 database contains edit checks to support data quality and completeness. These edit checks identify data  
612 that is out-of-range, missing, or potentially in conflict with other data. Data quality and completeness  
613 reports will be developed to monitor the quality of the data. Additionally, REDCap supports “skip” logic to  
614 ensure that data are entered appropriately.

615  
616 The tracking system built using STRIDE Project Tracker enables the Recruitment & Interview Team to  
617 monitor the flow of participants and data through the protocol; and to assist in maintaining appropriate  
618 contacts with patients. The system also tracks that the necessary contacts are being made ensuring that  
619 study participants are closely followed.

620  
621 REDCap accommodates ‘form specific’ access control. This provides a mechanism for allowing different  
622 study team members to access different forms. Specifically, certain member will have access to ONLY  
623 treatment data, while a different group will have access to all other study data. This ensures that only  
624 appropriate study team members have access to treatment assignment data and outcomes data.

625  
626 REDCap includes robust account and access control functionality. User accounts and groups are  
627 maintained by the Database Manager. Each user is granted only the appropriate levels of access to  
628 REDCap features, functionality, and data. For example, the Study Statistician might have access to  
629 download an analysis database, but would not be granted access to the data entry environment.  
630 Additionally, access can be granted at the “form” level. This helps to ensure proper masking of data, as  
631 deemed necessary and appropriate.

### 632 633 **18b. Data entry**

634 A two-phase data entry model will be implemented for the STRIDE REDCap database. All data will be  
635 entered into the STRIDE REDCap database by one of the Assessment Team members. Initially, each  
636 entered form will be left in an ‘unverified’ state. Subsequent to initial entry, the STRIDE ‘reviewer’ will  
637 compare what was entered with what is on the original forms. Any necessary corrections are made, the  
638 entered form is marked as ‘Complete’ in the software and the record is ‘locked’, preventing future  
639 changes. These steps help to ensure a high standard of data quality. By utilizing the built-in features of  
640 ‘record state’ (unverified and complete) and the ability to ‘lock’ records, the progression of data entry can  
641 be monitored to ensure timely and accurate data entry. REDCap also includes an extensive audit trail.  
642 Changes to records and fields are captured, including the prior value, when the change was made, and  
643 by whom.

644  
645 REDCap training is provided for those using REDCap and/or the STRIDE Project Tracker database. As  
646 staff or roles change, addition training will be provided. Support for system usage is made available as  
647 necessary. Additional training materials will be generated as deemed appropriate and necessary.

### 648 649 **19. Quality assurance**

## Appendix. STRIDE Protocol

650  
651 Trial Oversight and Coordination has overall responsibility for developing and implementing quality  
652 assurance and monitoring for STRIDE. Performance monitoring reports are prepared by Trial Oversight  
653 and Coordination using the definitions outlined below. Trial Oversight and Coordination uses these  
654 reports to identify whether special training or assistance is required and to prepare training sessions.  
655

### 656 **19a. Definitions of STRIDE protocol violations, deviations, and departures**

657 *Violations:* a breach of STRIDE protocol resulting in an adverse effect on the scientific integrity of the  
658 study. Protocol violations include, but are not limited to:

- 659 • Failure to perform the assigned anesthesia (i.e., crossovers to opposite treatment, no  
660 surgery);
- 661 • Permitting a person or persons that have not met the requirements for the study to participate  
662 in STRIDE procedures (e.g., uncertified personnel administering the assigned anesthesia);
- 663 • Committing willful or repeated infractions that may affect study outcomes (e.g., unmasking of  
664 study personnel); and
- 665 • Engaging in fraudulent acts that could be construed as either illegal or unethical or  
666 undermining the validity or reliability of study data (e.g., deliberately enrolling an ineligible  
667 participant or purposely providing inaccurate information on forms).

668  
669 *Deviations:* an error or infraction of STRIDE protocol that may compromise the ability to measure reliably  
670 any study outcome. Protocol deviations include, but are not limited to:

- 671 • Performing inadvertently or unintentionally a prohibited STRIDE procedure on no more than  
672 one occasion (e.g., mistakenly enrolling an ineligible participant);
- 673 • Conducting inadequate follow-up of an enrolled participant (e.g., losing track of a randomized  
674 participant); and
- 675 • Inadequately performing or documenting a study procedure (e.g., inadequate eligibility  
676 screening).

677  
678 *Departures:* the occurrence of a study visit outside of the established time frames. Protocol departures  
679 may adversely affect the study outcome especially if they happen on multiple occasions, and are  
680 monitored as an element of clinical center performance.

### 681 **19b. Definitions of screening failure or subject removal criteria**

682 Patients defined as “screening failures” are those patients who are not eligible on one of the screening  
683 measures (e.g., MMSE failure, excluded medication on Form 2B). These patients are not eligible to be  
684 consented.  
685

686  
687 Patients defined as “Consented/Non-randomized” are those who become ineligible for the study after they  
688 have already consented, e.g., patients for whom we are unable to achieve a satisfactory level of spinal  
689 anesthesia, or consented patients discovered to have taken clopidogrel or other disqualifying drug within  
690 7 days of surgery.

691 The “subject removal criterion” is refusal of the consented patient to participate in follow-up.  
692

## 693 **20. Statistical methods**

### 694 **20a. Covariates**

695 Randomization theory implies that there will be no confounding variables, and thus that no other  
696 independent variables need to be included in the regression models for adjustment to obtain an unbiased  
697 estimate of treatment effect. Nevertheless, the treatment groups will be compared on baseline medical,  
698 social, and demographic variables, to find any variables with important distributions that are different  
699 between groups, and any such discrepant variables will be examined for possible confounding in the  
700 regression analyses. In addition, these variables will be investigated to determine whether their inclusion  
701 in the regression model improves the precision of the estimate of the treatment effect.  
702

703  
704 Although the stratification variables of participant age and dementia status will most likely be balanced

705 between the two intervention arms, we will include them as covariates in the analysis to reduce outcome  
706 variability associated with these two factors. For exploratory analyses of the primary and secondary  
707 outcomes in relation to the measures of actual level of sedation, the data will be treated as observational,  
708 and potential confounders will be identified based on a priori knowledge and /or their associations with the  
709 outcome and predictor of interest in such analyses.

710

#### 711 **20b. Preliminary analysis**

712 Standard preliminary analyses will include examining distributions and computing rates or means and  
713 standard deviations for all variables at each observation point, and comparing rates or means in the two  
714 treatment groups. For the main study analyses comparing the two treatment groups, logistic regression,  
715 Poisson regression, and survival analysis methods will be used, as described below.

716

#### 717 **20c. Primary analysis**

718 The primary analysis for the STRIDE trial will test the contrast comparing the probabilities of a patient  
719 having any in-hospital (days 1-5) delirium between the randomly assigned intervention groups (deep  
720 versus light sedation) according to the intention-to-treat approach. The predictor of interest is the  
721 intervention group assignment, and participants will be included in the group to which they were randomly  
722 assigned regardless of sedation level actually received.

723

724 First, we will conduct logistic regression, with the primary outcome variable (any in-hospital delirium,  
725 yes/no) as the binary outcome and the intervention group assignment the primary predictor variable in the  
726 model. The model will include relevant baseline characteristics found to be unbalanced between  
727 intervention groups, and the stratification variable of age and pre-hospital dementia status as covariates.  
728 The adjusted odds ratio estimate derived from the model could be easily converted to adjusted relative  
729 risk estimate given that the marginal probability for the binary outcome will be estimable under the trial  
730 design.

731

732 We do not expect missing data for the primary outcome as supported by our preliminary trial data. In the  
733 rare event that death or other severe medical events during operation or immediately post-surgery (i.e.,  
734 days 1-5) would prevent full assessment of the outcome value for that randomized participant, the  
735 following approach will be adopted for data analyses.

736

737 Let  $Y$  denote the primary outcome of in hospital post-operative delirium,  $X$  the predictors (intervention  
738 group assignment variable and included baseline covariates), and  $D$  the binary variable of death prior to  
739 discharge (coded as 1 = yes, 0 = no). The goal of the primary analysis is to model  $\Pr(Y | X)$ , which can  
740 be decomposed using conditional probabilities:

741

$$742 \Pr(Y | X) = \Pr(Y | D = 0, X) \cdot \Pr(D = 0 | X) + \Pr(Y | D = 1, X) \cdot \Pr(D = 1 | X),$$

743

744 where  $\Pr(Y | D = 1, X)$  is not observable. Note that  $\Pr(D | X)$  is estimable, and in the event that  $\Pr(D =$   
745  $1 | X)$  is very small, which is expected as we observed no death prior to discharge in our preliminary trial,  
746  $\Pr(Y | X) \approx \Pr(Y | D = 0, X)$ . Therefore, when no or very few deaths occur before discharge, we do not  
747 expect to incur much bias in our inferences by approximating the primary analysis goal of  $\Pr(Y | X)$  with  
748 modeling of  $\Pr(Y | D = 0, X)$ , which is estimable based on the observed data.

749

750 In the case where  $\Pr(Y, D | X) = \Pr(Y | X) \cdot \Pr(D | X)$ , or equivalently  $\Pr(Y | X) = \Pr(Y | D, X)$ , the  
751 random process for death prior to discharge ( $D$ ) is conditionally independent of the outcome values ( $Y$ ),  
752 given the intervention group assignment and relevant baseline covariates ( $X$ ). In such case, the missing  
753 data in  $Y$  due to death ( $D = 1$ ) is considered "missing at random" (MAR), and the inferences on  $\Pr(Y | X)$   
754 based on modeling  $\Pr(Y | D = 0, X)$  using data with observed  $Y$  values only, though inefficient, will still  
755 be valid. Whether data missing is MAR or not cannot be empirically verified without auxiliary data on the  
756 missing  $Y$  values, so we must also contemplate the possibility of non-MAR missing data process. To  
757 evaluate the potential impact of non-MAR missing data processes on our inferences based on the  
758 observed data, we will conduct sensitivity analyses through multiple imputation of missing data from  
759 models of  $\Pr(Y | D = 1, X)$  deviated from the assumed model of  $\Pr(Y | D = 1, X)$  under various  
760 scenarios.

761  
762 In addition, we will utilize repeated assessments of delirium during the hospital stay while accounting for  
763 the potentials for different length of hospital stay (LOS). The average LOS for elderly hip fracture  
764 participants is 3 days. We will code a participant as having a recurrent delirium in hospital if this  
765 participant had a previous delirium positive assessment, followed by at least one negative daily delirium  
766 assessment prior to the new assessment of positive delirium while still in hospital. We will use Poisson  
767 regression model with over dispersion (i.e. negative binomial model), offset by person-day of observation  
768 based on LOS, to estimate in hospital incidence of delirium for each intervention group while accounting  
769 for the potential variance inflation due to recurrent events from the same participant. Rate ratio and  
770 corresponding 95% confidence interval (CI) comparing incidence between the two intervention groups will  
771 be calculated using robust estimates. The analysis will be based on intention-to-treat, and covariates will  
772 be included for model adjustment as appropriate. Further analyses will stratify the analysis by evidence of  
773 baseline co-morbidities, to account for the longer length of hospital stay (LOS) for sicker participants.  
774

#### 775 **20d. Secondary Analysis**

776 Secondary analysis will compare the main secondary outcome of mortality at 1 year (12 months) following  
777 surgery between intervention groups by the intention-to-treat approach.  
778

##### 779 Mortality at 1-year:

780 For the outcome of time from surgery to death by the end of the 1-year (12-month) follow-up, outcome  
781 assessment will be done through regular phone contact with family members and search of the National  
782 Death Index, Social Security Death index, and obituaries, and exact date of death will be ascertained.  
783 Time to death from the surgery date will be calculated based on date of death. Based on data and  
784 experiences garnered from the preliminary trial, we expect very little missing data in this outcome. The  
785 secondary analysis will test the contrast for this outcome by comparing the risk of mortality over 1-year  
786 after surgery between the randomly assigned intervention groups.  
787

788 To explore the difference in cumulative mortality between the intervention groups, we will conduct Kaplan-  
789 Meier analysis to estimate the nonparametric 1-year survival curves for both intervention groups. The  
790 difference between the two survival curves will be tested using the log-rank test. Relative risk of 1-year  
791 mortality comparing the heavy sedation to the light sedation intervention group will be evaluated through  
792 estimated hazard ratios from the semi-parametric Cox proportional hazards model, with corresponding  
793 confidence intervals. The main model will have intervention group assignment as the primary predictor  
794 and include the same covariates as in the model for the primary analysis. Additional models will be  
795 constructed to explore the potential impact of covariates over time on the mortality outcome during the 1-  
796 year follow-up. For example, a model include the primary outcome variable of delirium status in hospital  
797 as an additional covariate could provide insight on whether the impact of depth of sedation on 1-year  
798 mortality might be mediated, at least partially, through postoperative delirium. Other variables collected  
799 preoperatively (such as the Charlson Co-Morbidity Index), perioperatively, or during follow-up can be  
800 used in additional multivariable modeling as appropriate. Information collected at baseline and updated  
801 during the follow-up will be used as time-dependent covariates to better reflect a dynamic covariate  
802 process over time. The proportional hazards assumption will be evaluated by examining the intervention  
803 group by survival time interaction term in the proportional hazards model as well as by examining the  
804 Schoenfeld residuals.  
805

#### 806 **20e. Other analyses**

807 Other analyses will include analyses of the maximal delirium severity scores in hospital and prevalence of  
808 delirium at 1-month post surgery, subgroup analyses of the primary and secondary outcomes (for  
809 example, subgroups based on baseline comorbid conditions), exploratory analyses of the primary and  
810 secondary outcomes in relation to the measures of actual level of sedation such as OAAS levels and BIS  
811 measures recorded, and other analyses related to tertiary outcomes.  
812

##### 813 Maximal delirium severity score:

814 The maximal delirium severity score is defined as the highest DRS-R-98 score recorded during  
815 postoperative (in-hospital) Day 1 to Day 5 or to hospital discharge (whichever occurs first). A relevant  
816 implicit assumption for using this outcome definition is that study participants reach their maximal DRS-R-

## Appendix. STRIDE Protocol

98 scores while in hospital. This will be the case if study participants who are discharged prior to postoperative Day 5 are delirium free between discharge and postoperative Day 5, so that the largest delirium severity based DRS-R-98 scores during the defined period will be observed in hospital prior to discharge. Examination of patients in our preliminary trial who were discharged before Day 5, and were discharged to the Bayview rehabilitation center (one of several used by discharged patients in that study) supports the validity of this assumption. We expect none or very little missing data (due to death prior to discharge, see details in discussions related to the primary outcome and primary analysis) in this outcome. Analysis for this outcome will test the contrast comparing the mean maximal delirium severity scores between the randomly assigned intervention groups.

Generalized linear models will be used to derive and compare the adjusted mean maximal severity scores between the randomly assigned intervention groups. The model will have intervention group assignment as the primary predictor and include the same covariates as in the model for the primary analysis. Ninety-five percent confidence intervals for the adjusted mean group differences will be computed. Transformation of outcome will be performed as necessary. Residual analysis will be conducted to ensure validity of model assumptions. The general approach for handling missing outcome data will be similar to that described for the primary analysis.

Delirium at 1-month:  
There will be no formal delirium assessment prior to the 1-month (30-day) post-surgery office visit after discharge. We anticipate that a small number of participants will die before the one-month follow-up, while 75% of those who are alive at one-month will come back to the hospital for a follow-up visit and the rest of those alive would require a home visit. The analysis will follow two-part modeling, with the first part modeling the probability of death at the 1-month follow-up, and the second part modeling the probability of having delirium among those who are still alive at 1-month post surgery.

Here let  $Y$  denote the delirium outcome at 1-month,  $X$  the predictors (intervention group assignment variable and included covariates), and  $D$  the binary variable of death prior to 1-month (coded as 1 = yes, 0 = no). The goal of this analysis is to model  $\Pr(Y | X)$ , which can be decomposed using conditional probabilities:

$$\Pr(Y | X) = \Pr(Y | D = 0, X) \cdot \Pr(D = 0 | X) + \Pr(Y | D = 1, X) \cdot \Pr(D = 1 | X),$$

where  $\Pr(Y | D = 1, X)$  is not observable. Note that  $\Pr(D | X)$  is estimable, and in the event that  $\Pr(D = 1 | X)$  is very small,  $\Pr(Y | X) \approx \Pr(Y | D = 0, X)$ . Therefore, we do not expect to incur much bias in inferences by approximating  $\Pr(Y | X)$  with modeling of  $\Pr(Y | D = 0, X)$ , which is estimable based on the observed data, if very few deaths occur before discharge,

In the case where  $\Pr(Y, D | X) = \Pr(Y | X) \cdot \Pr(D | X)$ , or equivalently  $\Pr(Y | X) = \Pr(Y | D, X)$ , the random process for death prior to discharge ( $D$ ) is conditionally independent of the outcome values ( $Y$ ), given the intervention group assignment and relevant baseline covariates ( $X$ ). In such case, the missing data in  $Y$  due to death ( $D = 1$ ) is considered "missing at random" (MAR), and the inferences on  $\Pr(Y | X)$  based on modeling  $\Pr(Y | D = 0, X)$  using data with observed  $Y$  values only, though inefficient, will be valid. Whether data missing is MAR or not cannot be empirically verified without auxiliary data on the missing  $Y$  values, so we must consider the possibility of non-MAR missing data process. We will conduct sensitivity analyses through multiple imputation of missing data from models of  $\Pr(Y | D = 1, X)$  deviated from the observed model of  $\Pr(Y | D = 1, X)$  under various scenarios to evaluate the potential impact of non-MAR missing data processes on our inferences based on the observed data.

The model will be logistic regression-based and will include the intervention group assignment as the primary predictor as well as the same covariates as in the model for the primary analysis. Additional models will be constructed to explore the potential impact of covariates over time on the risk of delirium at 1-month follow-up. For example, a model that includes the primary outcome variable of delirium status in-hospital as an additional covariate could provide insight on whether the impact of depth of sedation on longer term delirium risk might be mediated, at least partially, through postoperative delirium in-hospital. Variables collected preoperatively, perioperatively, or during the 1-month follow-up assessments (e.g.,

873 depression status, medication use, and the Charlson Co-Morbidity Index) can be used in multivariable  
874 modeling as appropriate. Odds ratio estimates can be easily converted to relative risk estimates since we  
875 will be able to estimate marginal risk of delirium at the 1-month follow-up. Ninety-five percent confidence  
876 interval for the corresponding estimates will be computed.  
877

#### 878 **20f. Subgroup analyses**

879 We will explore potential differentiation of intervention effects by age, gender, or other demographic and  
880 clinical characteristics. The subgroup analyses will be performed both alone (only the data from the  
881 subgroup used in the regression) and also with all of the subgroup data combined with the use of cross  
882 product term of subgroup indicator variable by treatment indicator variable to evaluate subgroup by  
883 treatment interaction; estimates of the treatment effect for each level of the subgroup variable will be  
884 reported. These analyses will be exploratory for the purposes of generating hypotheses for future studies.  
885

#### 886 **20g. “On-treatment” analysis**

887 OAA/S levels or BIS values monitored over time in the operating room will be characterized into different  
888 “exposure” patterns and related to the outcomes of the study. For example, these analyses could explore  
889 whether observed associations are more likely to be related to the amount of cumulative exposure (area  
890 under the curve of OAA/S levels or BIS values over time during operation), peak exposure (maximal  
891 OAA/S levels or BIS values during operation), or cumulative “exposure” level above certain thresholds.  
892 These exposure variables could have overlapped values between the randomly assigned treatment  
893 groups, and will be treated as observational data so that potential confounding will have to carefully  
894 evaluated and managed as in any observational studies.  
895

#### 896 **20h. Analysis of adverse events**

897 Analyses of adverse events and related intervention safety issues will be reported to the DSMB at their  
898 periodic meetings, as well as trial performance with respect to participant recruitment and follow-up, and  
899 completeness and timely entry of study data, and corrections made to the database.  
900

#### 901 **20i. Interim analysis**

902 No interim data analyses will be conducted as discussed with the DSMB.  
903

#### 904 **20j. Missing Data**

905 Prevention of missing data is far superior to post hoc statistical treatment for missing data. Every effort  
906 will be made to ensure proper and complete data collection. We expect to have few missing data points  
907 on postoperative delirium evaluation in-hospital, although lack of data caused by death or other medical  
908 reason is possible. We expect little attrition at 1-month follow-up given that our follow-up protocol will  
909 include an option for a home visit. We also expect to have few missing data on the mortality outcome at  
910 1-year as our preliminary trial has flushed out a reliable process to ascertain deaths in the target patient  
911 population within our catchment area.  
912

913 Our main approach for handling missing data, when it occurs, will be conducting analyses under the  
914 assumption of data missing at random (MAR), where valid inferences can be achieved through multiple  
915 imputations or a maximum likelihood approach using correct models for the observed data. However, the  
916 validity of the MAR assumption cannot be empirically verified without auxiliary data / information on the  
917 missing values. Therefore, we will supplement our MAR analyses with carefully planned sensitivity  
918 analyses to check for the robustness of our inferences under various plausible non-MAR scenarios. For  
919 example, for those with persistent delirium in previous evaluations, it is more likely that the missing  
920 observation will also be positive on delirium. Hence it may be more reasonable to impute such missing  
921 values based on an appropriately constructed imputation distribution with high probability of being positive  
922 on the delirium outcome. We will include sensitivity analyses though multiple imputation of missing data  
923 from models deviating from the observed model under various scenarios deemed plausible by the DSMB  
924 as well as experts with extensive experience in delirium research.  
925

926

#### 927 **21. Protocol risks and participant protection**

928 The potential risks to subjects for the proposed study include difficulties adhering to study protocol,  
929 psychological risks associated with cognitive testing and risks to privacy and confidentiality. Each is  
930 discussed separately.

931

### 932 **21a. Medical risks and expected frequency**

933 This study examines different sedation levels; we are not interested in studying patients who require  
934 intubation to maintain their airway as this adds an additional variable to the study. From a safety  
935 perspective, as seen in our preliminary data, neither level of sedation incurs increased risks in terms of  
936 hypotension or airway compromise during spinal anesthesia with propofol sedation.

937

938 Psychological risks associated with neuropsychological testing are generally irritation at the question set,  
939 with many patients suggesting that the questions are unwise. In addition, subjects who are evidently  
940 having a hard time completing the battery frequently get frustrated. There is no permanent injury  
941 associated with either the dementia or delirium testing batteries, and staff will be trained to minimize any  
942 irritation and to be supportive of the study participants.

943

944 Whenever protected health information is collected, there are potential risks to privacy and confidentiality.  
945 All personnel will be trained to assure compliance with the HIPAA regulations. The data collection  
946 instruments will be stored in secure locations, and the database will only contain coded information. The  
947 key to the code will be maintained within locked file cabinets.

948

949 There are no currently approved treatments for delirium. For the proposed study, the only true alternative  
950 is not to participate.

951

### 952 **21b. Confidentiality**

953 We will be collecting demographic information, in addition to the study information. All information  
954 collected will be handled per institutional protocol for protected health information.

955

## 956 **22. Consent**

957 Written informed consent is obtained from all STRIDE participants. There is no payment for study  
958 subjects. The Assessment Team members are the persons conducting the informed consent discussion  
959 with the subject. Consent will be obtained pre-operatively, in the patient's hospital room or in the  
960 emergency room if the patient has not been transferred to a hospital room. The time allotted for obtaining  
961 consent is 30-40 minutes. The reading level of the consent form is Grade 7.9 Flesch-Kincaid level, per  
962 Microsoft WORD 2007. Comprehension of the consent information will be assessed by asking patients to  
963 state in their own words the concepts research staff had presented to them. An "Evaluation to Give  
964 Consent" form is filled out and witnessed for each patient before consent can be obtained. The same  
965 guidelines used for surgical and anesthetic consent are applied to this protocol's consent if some or all  
966 subjects are cognitively impaired or have language/hearing impairment. All consent forms and informative  
967 materials are written, and all testing is oral. Inclusion criteria require the ability to  
968 read/write/hear/speak/understand English. Inability of the person giving informed consent to  
969 speak/read/write/understand/hear English is an exclusion criterion.

970

## 971 **23. Data and safety monitoring plan**

### 972 **23a. DSMB composition**

973 The DSMB consists of five members and three members usually constitute a quorum. Members are  
974 recommended by the PI and /or NIA Program Official, and the NIA Director approves the composition of  
975 the DSMB and its membership. Membership consists of persons completely independent of the  
976 investigators who have no financial, scientific, or other conflict of interest with the trial. Collaborators or  
977 associates of Dr. Sieber are not eligible to serve on the DSMB. Written documentation attesting to  
978 absence of conflict of interest is required.

979

980 The DSMB includes experts in or representatives of the fields of:

981

- internal medicine,

982

- epidemiology

## Appendix. STRIDE Protocol

- 983 • biostatistics
- 984 • psychiatry
- 985 • anesthesiology.

986  
987 Dr. Jeff Carson, of UMDNJ-Robert Wood Johnson Medical School, has been selected by NIA in  
988 consultation with the PI to serve as the Chairperson and is responsible for overseeing the meetings,  
989 developing the agenda in consultation with the NIA Program Official and the PI. The Chair is the contact  
990 person for the DSMB. The *Johns Hopkins Medical Institutions* shall provide the logistical management  
991 and support of the DSMB. A medical safety officer (MSO) will be identified at the first meeting and is  
992 typically a physician independent of the DSMB. The MSO will be the contact person for serious adverse  
993 event (SAE) reporting. Procedures for notifying the Chair of the DSMB and the NIA Program Official will  
994 be discussed at the first meeting.

### 995 996 **23b. DSMB responsibilities**

997 The DSMB will have the authority to stop the study either because the hypotheses have been confirmed  
998 or denied, or because adverse events (AE) or SAEs are detected that require the study to be terminated  
999 or redesigned. In the case of concerns of futility not clearly associated with safety issues, the DSMB will  
1000 be advisory to NIA and the PI. The PI is responsible for notifying the IRB of significant unanticipated  
1001 events. The DSMB is responsible for reviewing all these events and overseeing PI activities related to  
1002 safety information. The DSMB reports as well as any actions taken will be reported to the IRB.

1003  
1004 Early in the trial, DSMB review will focus more on safety, quality of conduct, and trial integrity rather than  
1005 on efficacy evaluation. Later meetings may include formal efficacy or futility analyses. Early DSMB reports  
1006 will focus on simple descriptions of the demographic and diagnostic characteristics of the study  
1007 population and on the baseline data collected. Subsequent reports will include tabulations of this sort, as  
1008 well as a variety of more sophisticated analyses to draw inferences regarding study results. The DSMB  
1009 will discharge itself from its duties when the study is complete.

1010  
1011 Specifically, the DSMB responsibilities are to:

- 1012 • review the research protocol, informed consent documents and plans for data safety and  
1013 monitoring;
- 1014 • advise the NIA on the readiness of the study staff to initiate recruitment;
- 1015 • evaluate the progress of the trial, including periodic assessments of data quality and timeliness,  
1016 recruitment, accrual and retention, participant risk versus benefit, performance of the clinical  
1017 center, and other factors that can affect study outcome;
- 1018 • consider factors external to the study when relevant information becomes available, such as  
1019 scientific or therapeutic developments that may have an impact on the safety of the participants  
1020 or the ethics of the trial;
- 1021 • review study performance, make recommendations and assist in the resolution of problems  
1022 reported by the PI;
- 1023 • protect the safety of the study participants;
- 1024 • report to NIA on the safety and progress of the trial;
- 1025 • make recommendations to the NIA, the PI, and, if required, to the Food and Drug Administration  
1026 (FDA) concerning continuation, termination or other modifications of the trial based on the  
1027 observed beneficial or adverse effects of the treatment under study;
- 1028 • if appropriate, review interim analyses in accordance with stopping rules, which are clearly  
1029 defined in advance of data analysis and have the approval of the DSMB;
- 1030 • ensure the confidentiality of the study data and the results of monitoring; and,
- 1031 • assist the NIA by commenting on any problems with study conduct, enrollment, sample size  
1032 and/or data collection.

### 1033 1034 **23c. DSMB process**

1035 At the first meeting the DSMB will discuss the protocol, suggested modifications, and establish guidelines  
1036 to study monitoring by the Board. The DSMB Chairperson in consultation with the PI and the NIA

## Appendix. STRIDE Protocol

1037 Program Official as needed, will prepare the agenda to address the review of study materials,  
1038 modifications to the study protocol and informed consent document, initiation of the trial, appointment of a  
1039 safety officer, as needed, reporting of adverse events, statistical analysis plan including interim analysis  
1040 and stopping rules, etc.

1041  
1042 Meetings of the DSMB will be held at least once a year at the call of the Chairperson. The NIA Program  
1043 Official or designee will be present at every meeting. An emergency meeting of the DSMB may be called  
1044 at any time by the Chair or by the NIA should participant safety questions or other unanticipated problems  
1045 arise.

1046  
1047 Meetings shall be closed to the public because discussions may address confidential participant data.  
1048 Meetings are attended by the PI and members of his/her staff. Meetings may be convened as conference  
1049 calls as well as in-person. All materials, discussions and proceedings of the DSMB are completely  
1050 confidential. Members and other participants in DSMB meetings are expected to maintain confidentiality.

### 1051 1052 **23d. DSMB meeting format**

1053 DSMB meetings will consist of open and closed sessions. Discussion held in all sessions is confidential.  
1054 The PI and key members of the study team attend the open sessions. Open session discussion will focus  
1055 on the conduct and progress of the study, including participant accrual, protocol compliance, and  
1056 problems encountered. Unblinded data are not presented in the open session. The closed session will be  
1057 attended by the DSMB members and the NIA representative(s). The study statistician may be present, at  
1058 the request of the DSMB. Any data by blinded study group and, as necessary, unblinded data, are  
1059 presented during the closed session.

1060  
1061 If necessary, an executive session will be attended by voting DSMB members and the NIA staff and their  
1062 representatives. The executive session will be held to identify and discuss the DSMB's recommendations  
1063 to the NIA. The study staff may be present, at the request of the DSMB, during the executive session.

1064  
1065 Each meeting must include a recommendation to continue or to terminate the study made by a formal  
1066 DSMB majority or unanimous vote. A formal report containing the recommendations for continuation or  
1067 modifications of the study will be prepared by the DSMB Chairperson. Should the DSMB decide to issue  
1068 a termination recommendation, the full vote of the DSMB is required. In the event of a split vote, majority  
1069 vote will rule and a minority report should be appended. The DSMB Chair provides the tiebreaking vote in  
1070 the event of a 50-50 split vote.

1071  
1072 A recommendation to terminate the study may be made by the DSMB at any time by majority vote. The  
1073 Chair should provide such a recommendation to the NIA immediately by telephone and email. After the  
1074 NIA Director makes a decision about whether to accept or decline the DSMB recommendation to  
1075 terminate the study, the PI is immediately informed about his decision.

### 1076 1077 **23e. Publication of results**

1078 The DSMB should be given the opportunity to read and comment on any publications before submission.  
1079 DSMB members should be named and their affiliations listed in the main report, unless they explicitly  
1080 request otherwise. A brief summary of the timings and conclusions of DSMB meetings should be included  
1081 in the body of the main report. The DSMB may discuss issues from their involvement in the trial no sooner  
1082 than 12 months after the primary trial results have been published, or when permission is agreed with the  
1083 overseeing committee.

### 1084 1085 **23f. Role of MSO**

1086 The STRIDE Trial MSO will serve in an advisory capacity to the STRIDE Trial DSMB and the STRIDE  
1087 investigators executive committee to monitor patient safety.

1088  
1089 SAEs

## Appendix. STRIDE Protocol

1090 The MSO will review all SAEs submitted to the IRB from the clinical site.

1091 The process for the SAE review is as follows:

- 1092 1. Trial Oversight and Coordination will notify the PI of any SAE and they will jointly prepare a draft SAE  
1093 report for IRB submission. It is the responsibility of the PI to finalize the SAE report and narrative  
1094 summary and submit to the IRB. Trial Oversight and Coordination will forward the SAE report to the  
1095 MSO via e-mail following receipt of the SAE narrative.
- 1096 2. The MSO will review the SAE narrative and notify Trial Oversight and Coordination whether additional  
1097 information is needed in making any study related decisions.
- 1098 3. If additional information is needed, Trial Oversight and Coordination will contact the clinical study  
1099 team and any requested additional information will be obtained and transmitted to the MSO.
- 1100 4. The MSO will review all SAE materials and reply to the original SAE notification e-mail with a  
1101 determination regarding whether or not the reported event was:  
1102 a) related to the study protocol using one of the following categories:  
1103 definitely related;  
1104 probably related;  
1105 indeterminate;  
1106 unlikely to be related;  
1107 definitely unrelated.  
1108 b) whether the SAE was expected or unexpected.
- 1109 5. Trial Oversight and Coordination will send SAE reports to the NIH Project Officer and the DSMB  
1110 chairperson at the same time. These individuals will review the report, may consult with the MSO and  
1111 may decide to convene the DSMB to discuss issues related to monitoring such events. The DSMB,  
1112 as an advisory body to the NIA, may advise early termination of the trial for safety reasons or make  
1113 other recommendations regarding modifications to the protocol.
- 1114 6. A report of all AEs (both serious and non-serious) will be compiled every 12 months during subject  
1115 recruitment and shared with the MSO, DSMB chair, and NIA Project Officer.  
1116

### 1117 Definitions:

#### 1118 SAE

1119 An adverse event will be considered to be serious if it is or results in any of the following:

- 1120 ▪ death;
- 1121 ▪ life-threatening;
- 1122 ▪ inpatient hospitalization or prolongation of existing hospitalization;
- 1123 ▪ significant or permanent disability;
- 1124 ▪ medical intervention to prevent permanent damage (e.g., intensive emergency treatment of  
1125 allergic bronchospasm; blood dyscrasias or convulsions not requiring inpatient  
1126 hospitalization; development of drug dependency or drug abuse).

#### 1127 Related to STRIDE protocol

1128 The phrase “related to the STRIDE protocol” implies related or possibly related to participation in the  
1129 research, i.e., is there a definite or reasonable possibility that the incident, experience or outcome  
1130 may have been caused by the study intervention.  
1131

#### 1132 Unexpected

1133 The term unexpected refers to an adverse event that has not been previously known or expected to  
1134 be associated with the study procedures and clinical population involved in the STRIDE protocol. It is  
1135 judged in terms of the nature, severity or frequency of the event, given the research protocol, IRB  
1136 approved informed consent document, and other sources of information, and relative to the  
1137 characteristics of the subject population being studied (expected natural progression of subject’s  
1138 disease, disorder or condition or predisposing risk factors).  
1139

### 1140 **References:**

- 1141 1. Rasmussen LS, JT M. Central nervous system dysfunction after anesthesia in the geriatric patient.  
1142 *Anesthesiol Clin North America*. 2000;18(1):59-70.  
1143

## Appendix. STRIDE Protocol

- 1144 2. McCusker J, Cole MG, Dendukuri N, Belzile E. Does delirium increase hospital stay? *J Am Geriatr Soc.* 2003;51(11):1539-1546.  
1145  
1146 3. Pandharipande P, Jackson J, Ely EW. Delirium: Acute cognitive dysfunction in the critically ill. *Curr Opin Crit Care.* 2005;11(4):360-368.  
1147  
1148 4. Pandharipande P, Ely EW. Sedative and analgesic medications: Risk factors for delirium and sleep  
1149 disturbances in the critically ill. *Crit Care Clin.* 2006;22(2):313-27, vii.  
1150 5. Sieber FE, Zakriya KJ, Gottschalk A, et al. Sedation depth during spinal anesthesia and the  
1151 development of postoperative delirium in elderly patients undergoing hip fracture repair. *Mayo Clin*  
1152 *Proc.* 2010;85(1):18-26.  
1153  
1154  
1155  
1156  
1157  
1158  
1159  
1160  
1161  
1162  
1163  
1164  
1165  
1166  
1167  
1168  
1169  
1170  
1171  
1172  
1173  
1174  
1175  
1176  
1177  
1178  
1179  
1180  
1181  
1182  
1183

1184 **Table 1: Observer's assessment of alertness/sedation scale (OAA/S)**  
1185  
1186  
1187

| 1188 | <b>Response</b>                                         | <b>Score Level</b> |
|------|---------------------------------------------------------|--------------------|
| 1189 |                                                         |                    |
| 1190 | Responds readily to name spoken in normal tone          | 5 (Alert)          |
| 1191 | Lethargic response to name spoken in normal tone        | 4                  |
| 1192 | Responds only after name is called loudly or repeatedly | 3                  |
| 1193 | Responds only after mild prodding or shaking            | 2                  |
| 1194 | Does not respond to mild prodding or shaking            | 1                  |
| 1195 | Does not respond to noxious stimuli                     | 0                  |

1196  
1197  
1198  
1199  
1200
